# Supplementary material for: Taxonomic and chemical assessment of exceptionally abundant rock mine biofilm
Source: PeerJ journal article supplement (doi:10.7717/peerj.3635), 2017-08-15

# ENERGY SOURCE

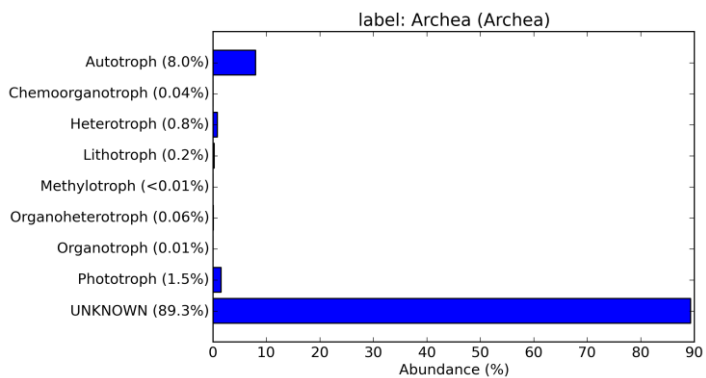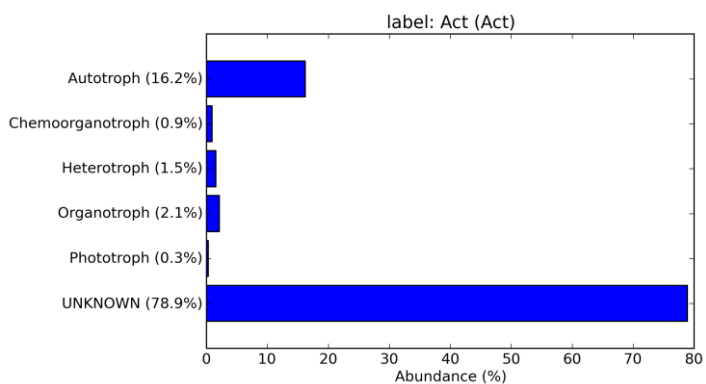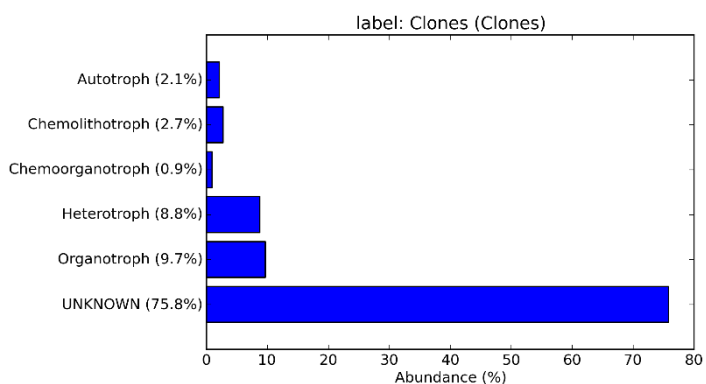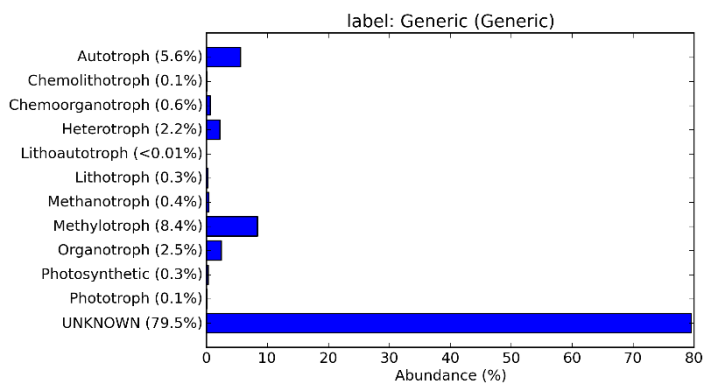

# OXYGEN REQUIREMENT

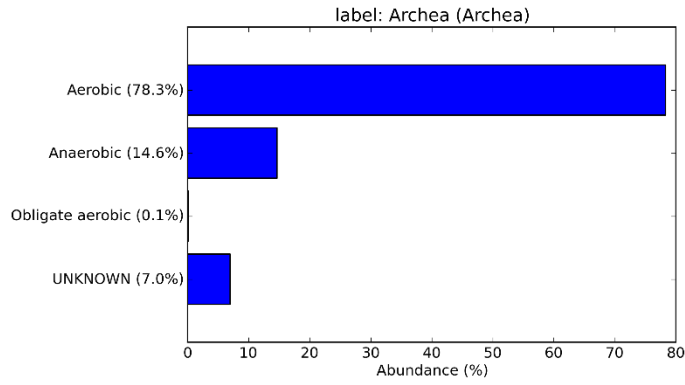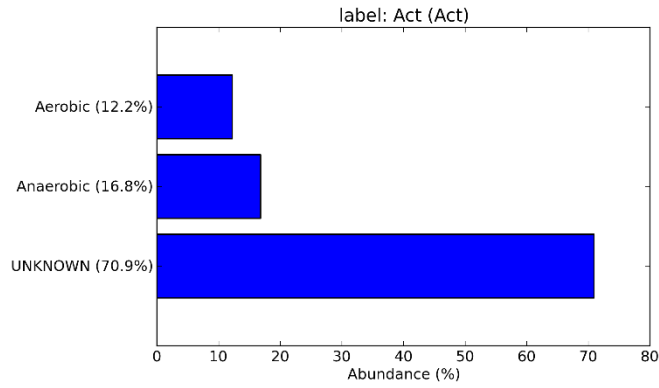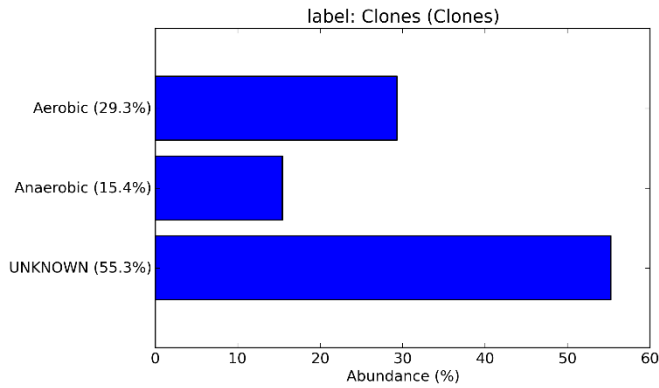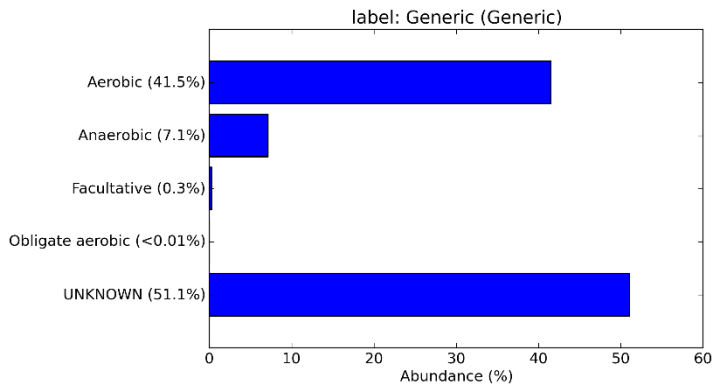

# METABOLISM

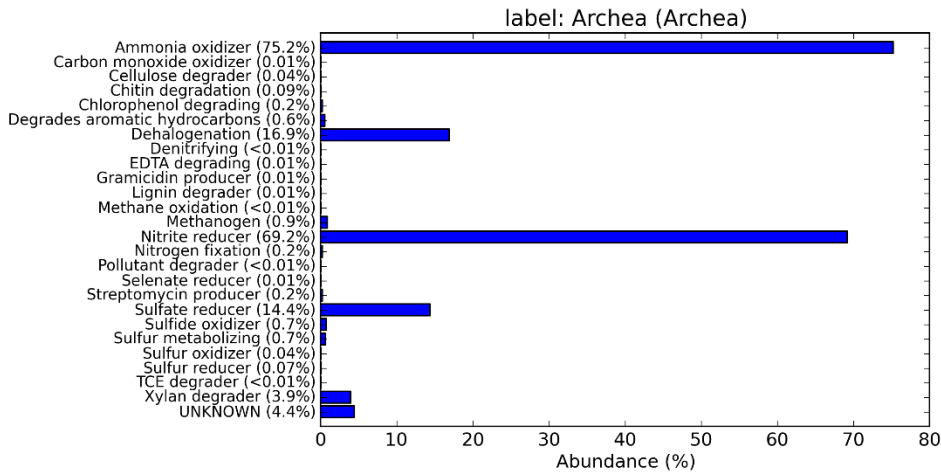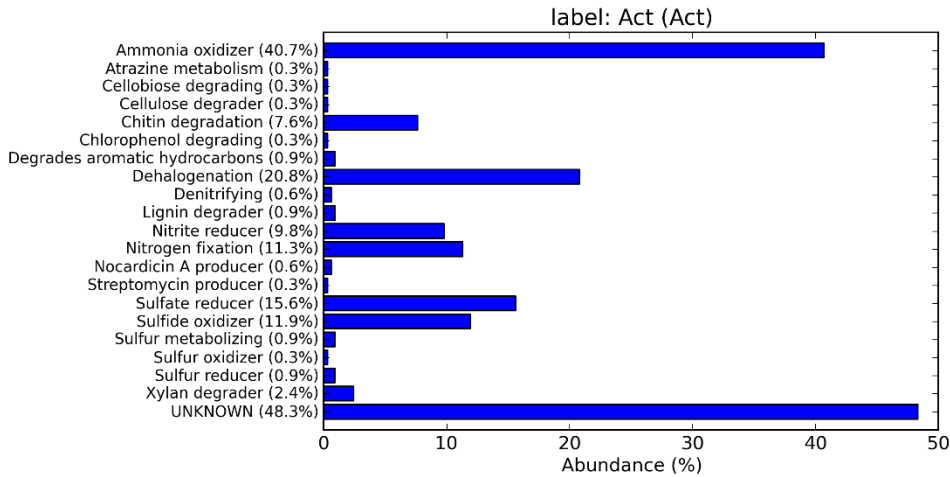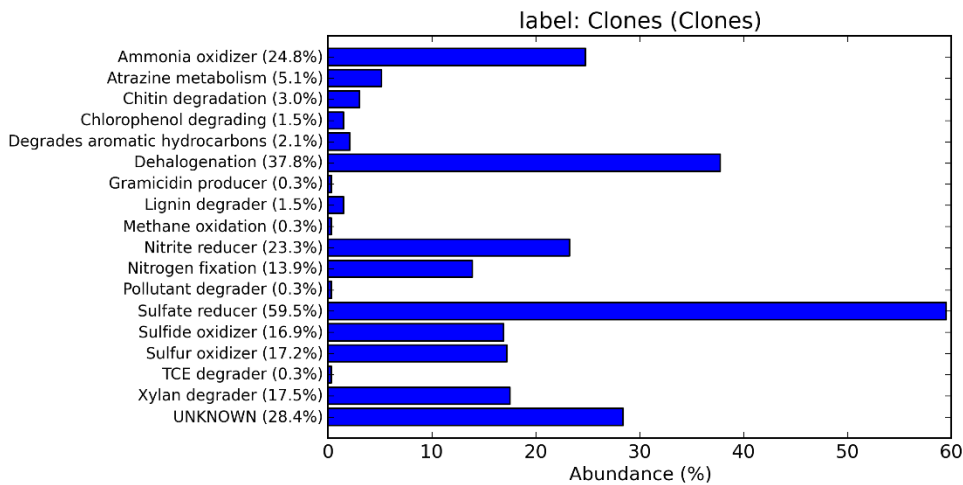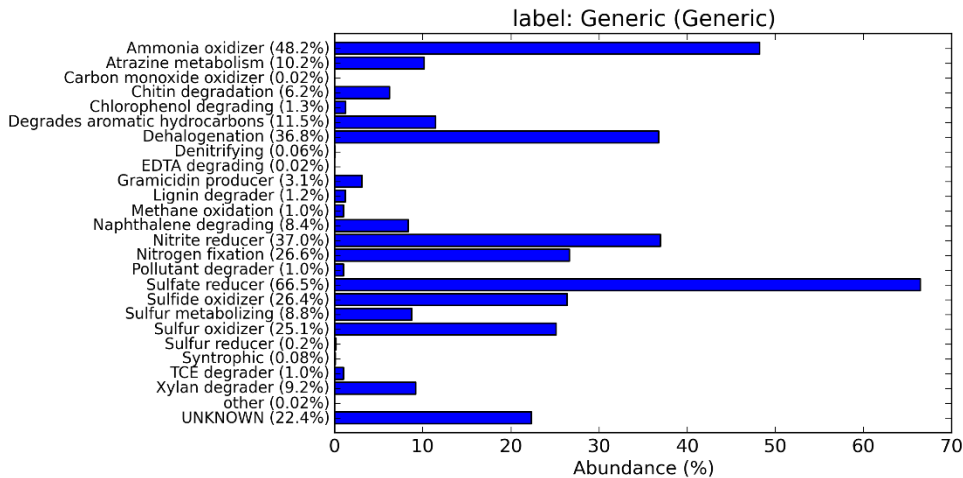

# BIOTIC RELATIONSHIP

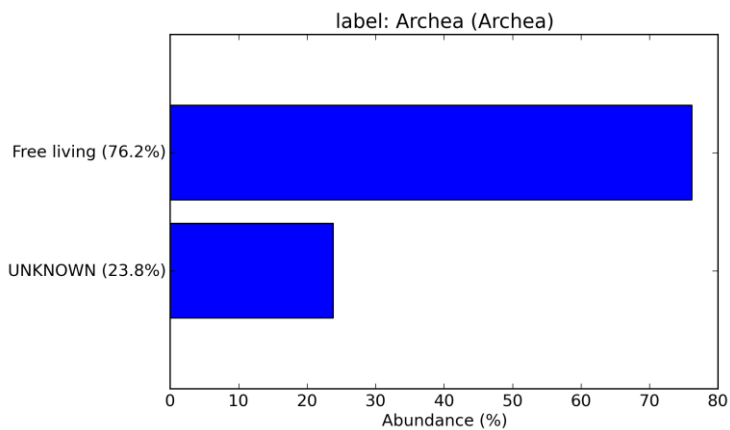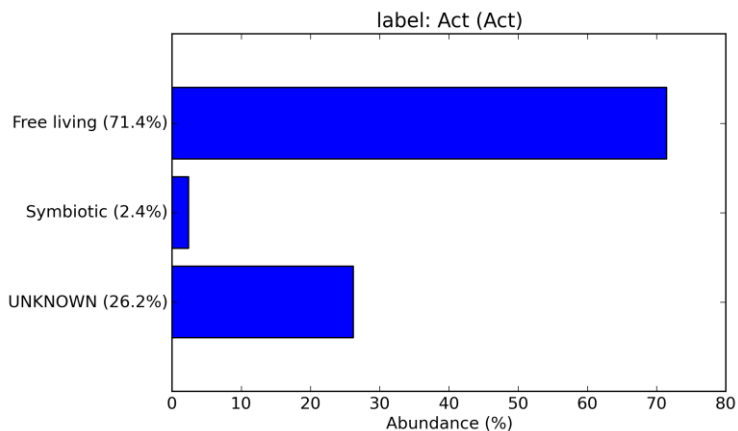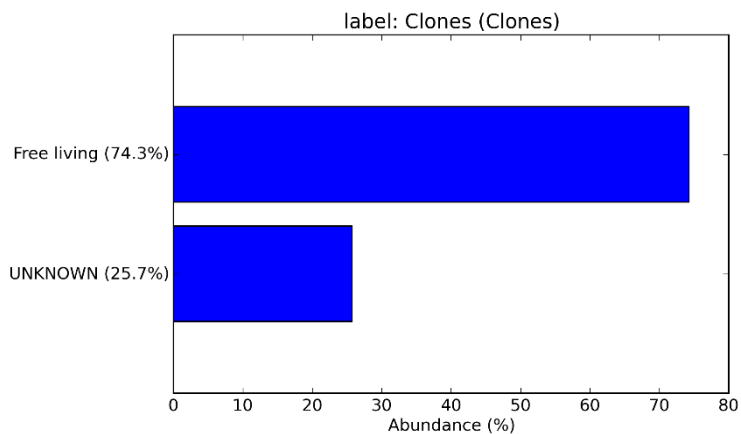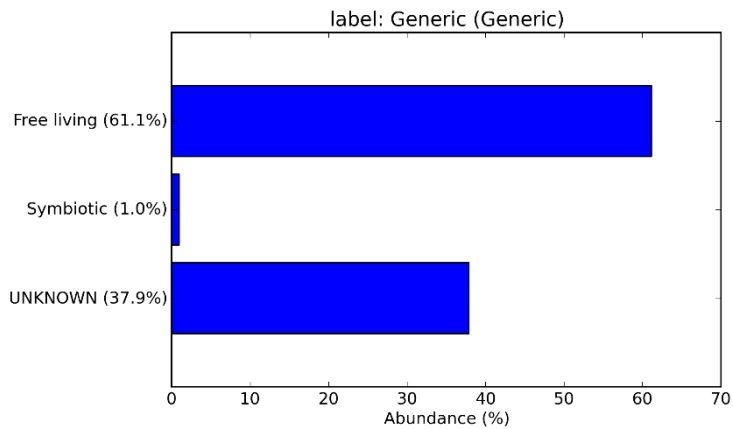

Supplement: Figure_S2.pdf [file Figure_S2.pdf]
