# Supplementary material for: Taxonomic and chemical assessment of exceptionally abundant rock mine biofilm
Source: PeerJ journal article supplement (doi:10.7717/peerj.3635), 2017-08-15
Supplement: Table_S4.pdf [file Table_S4.pdf]

| taxi_eve | rankID          | Taxon                         | daught | Total | Clones | Act | Generic | Archea |
|----------|-----------------|-------------------------------|--------|-------|--------|-----|---------|--------|
| 0        | 0               | Root                          | 2      | 0     | 0      | 0   | 0       | 0      |
| 1        | 0,1             | Archaea                       | 2      | 38    | 0      | 10  | 0       | 37     |
| 2        | 0.1.1           | Crenarchaeota                 | 1      | 13    | 0      | 5   | 0       | 12     |
| 3        | 0.1.1.1         | Thermoprotei                  | 4      | 13    | 0      | 5   | 0       | 12     |
| 4        | 0.1.1.1.1       | Acidilobales                  | 1      | 1     | 0      | 1   | 0       | 0      |
| 5        | 0.1.1.1.1.1     | Acidilobaceae                 | 1      | 1     | 0      | 1   | 0       | 0      |
| 6        | 0.1.1.1.1.1.1   | Acidilobus                    | 0      | 1     | 0      | 1   | 0       | 0      |
| 4        | 0.1.1.1.2       | Desulfurococcales             | 2      | 8     | 0      | 2   | 0       | 8      |
| 5        | 0.1.1.1.2.1     | Desulfurococcaceae            | 5      | 5     | 0      | 2   | 0       | 5      |
| 6        | 0.1.1.1.2.1.1   | Ignisphaera                   | 0      | 0     | 0      | 0   | 0       | 1      |
| 6        | 0.1.1.1.2.1.2   | Stetteria                     | 0      | 1     | 0      | 0   | 0       | 1      |
| 6        | 0.1.1.1.2.1.3   | Sulfophobococcus              | 0      | 1     | 0      | 0   | 0       | 1      |
| 6        | 0.1.1.1.2.1.4   | Thermodiscus                  | 0      | 1     | 0      | 0   | 0       | 1      |
| 6        | 0.1.1.1.2.1.5   | Thermosphaera                 | 0      | 1     | 0      | 1   | 0       | 1      |
| 5        | 0.1.1.1.2.2     | Pyrodictiaceae                | 3      | 3     | 0      | 0   | 0       | 3      |
| 6        | 0.1.1.1.2.2.1   | Hyperthermus                  | 0      | 1     | 0      | 0   | 0       | 1      |
| 6        | 0.1.1.1.2.2.2   | Pyrodictium                   | 0      | 1     | 0      | 0   | 0       | 1      |
| 6        | 0.1.1.1.2.2.3   | Pyrolobus                     | 0      | 1     | 0      | 0   | 0       | 1      |
| 4        | 0.1.1.1.3       | Sulfolobales                  | 1      | 1     | 0      | 0   | 0       | 1      |
| 5        | 0.1.1.1.3.1     | Sulfolobaceae                 | 1      | 1     | 0      | 0   | 0       | 1      |
| 6        | 0.1.1.1.3.1.1   | Sulfurisphaera                | 0      | 1     | 0      | 0   | 0       | 1      |
| 4        | 0.1.1.1.4       | Thermoproteales               | 2      | 3     | 0      | 2   | 0       | 3      |
| 5        | 0.1.1.1.4.1     | Thermofilaceae                | 1      | 1     | 0      | 0   | 0       | 1      |
| 6        | 0.1.1.1.4.1.1   | Thermofilum                   | 0      | 1     | 0      | 0   | 0       | 1      |
| 5        | 0.1.1.1.4.2     | Thermoproteaceae              | 2      | 2     | 0      | 2   | 0       | 2      |
| 6        | 0.1.1.1.4.2.1   | Caldivirga                    | 0      | 1     | 0      | 1   | 0       | 1      |
| 6        | 0.1.1.1.4.2.2   | Thermocladium                 | 0      | 1     | 0      | 1   | 0       | 1      |
| 2        | 0.1.2           | Euryarchaeota                 | 6      | 25    | 0      | 5   | 0       | 25     |
| 3        | 0.1.2.1         | Methanomicrobia               | 3      | 8     | 0      | 1   | 0       | 8      |
| 4        | 0.1.2.1.1       | Methanocellales               | 1      | 1     | 0      | 0   | 0       | 1      |
| 5        | 0.1.2.1.1.1     | Methanocellaceae              | 1      | 1     | 0      | 0   | 0       | 1      |
| 6        | 0.1.2.1.1.1.1   | Methanocella                  | 0      | 1     | 0      | 0   | 0       | 1      |
| 4        | 0.1.2.1.2       | Methanomicrobiales            | 2      | 4     | 0      | 0   | 0       | 4      |
| 5        | 0.1.2.1.2.1     | Methanomicrobiaceae           | 3      | 3     | 0      | 0   | 0       | 3      |
| 6        | 0.1.2.1.2.1.1   | Methanolacinia                | 0      | 1     | 0      | 0   | 0       | 1      |
| 6        | 0.1.2.1.2.1.2   | Methanomicrobium              | 0      | 1     | 0      | 0   | 0       | 1      |
| 6        | 0.1.2.1.2.1.3   | Methanosphaerula              | 0      | 1     | 0      | 0   | 0       | 1      |
| 5        | 0.1.2.1.2.2     | Methanomicrobiales_incertae_s | 1      | 1     | 0      | 0   | 0       | 1      |
| 6        | 0.1.2.1.2.2.1   | Methanolinea                  | 0      | 1     | 0      | 0   | 0       | 1      |
| 4        | 0.1.2.1.3       | Methanosarcinales             | 2      | 3     | 0      | 1   | 0       | 3      |
| 5        | 0.1.2.1.3.1     | Methanosarcinaceae            | 2      | 2     | 0      | 1   | 0       | 2      |
| 6        | 0.1.2.1.3.1.1   | Methanimicrococcus            | 0      | 1     | 0      | 1   | 0       | 1      |
| 6        | 0.1.2.1.3.1.2   | Methanosalsum                 | 0      | 1     | 0      | 0   | 0       | 1      |
| 5        | 0.1.2.1.3.2     | Methermicrococcaceae          | 1      | 1     | 0      | 0   | 0       | 1      |
| 6        | 0.1.2.1.3.2.1   | Methermicrococcus             | 0      | 1     | 0      | 0   | 0       | 1      |
| 3        | 0.1.2.2         | Archaeoglobi                  | 1      | 2     | 0      | 0   | 0       | 2      |
| 4        | 0.1.2.2.1       | Archaeoglobales               | 1      | 2     | 0      | 0   | 0       | 2      |
| 5        | 0.1.2.2.1.1     | Archaeoglobaceae              | 2      | 2     | 0      | 0   | 0       | 2      |
| 6        | 0.1.2.2.1.1.1   | Ferroglobus                   | 0      | 1     | 0      | 0   | 0       | 1      |
| 6        | 0.1.2.2.1.1.2   | Geoglobus                     | 0      | 1     | 0      | 0   | 0       | 1      |
| 3        | 0.1.2.3         | Halobacteria                  | 1      | 11    | 0      | 4   | 0       | 11     |
| 4        | 0.1.2.3.1       | Halobacteriales               | 1      | 11    | 0      | 4   | 0       | 11     |
| 5        | 0.1.2.3.1.1     | Halobacteriaceae              | 11     | 11    | 0      | 4   | 0       | 11     |
| 6        | 0.1.2.3.1.1.1   | Haladaptatus                  | 0      | 1     | 0      | 0   | 0       | 1      |
| 6        | 0.1.2.3.1.1.2   | Halogeometricum               | 0      | 1     | 0      | 0   | 0       | 1      |
| 6        | 0.1.2.3.1.1.3   | Halomicrobium                 | 0      | 1     | 0      | 0   | 0       | 1      |
| 6        | 0.1.2.3.1.1.4   | Halopiger                     | 0      | 1     | 0      | 0   | 0       | 1      |
| 6        | 0.1.2.3.1.1.5   | Haloplanus                    | 0      | 1     | 0      | 1   | 0       | 1      |
| 6        | 0.1.2.3.1.1.6   | Haloquadratum                 | 0      | 1     | 0      | 1   | 0       | 1      |
| 6        | 0.1.2.3.1.1.7   | Halosarcina                   | 0      | 1     | 0      | 1   | 0       | 1      |
| 6        | 0.1.2.3.1.1.8   | Halosimplex                   | 0      | 1     | 0      | 0   | 0       | 1      |
| 6        | 0.1.2.3.1.1.9   | Halostagnicola                | 0      | 1     | 0      | 1   | 0       | 1      |
| 6        | 0.1.2.3.1.1.10  | Natronobacterium              | 0      | 1     | 0      | 0   | 0       | 1      |
| 6        | 0.1.2.3.1.1.1.1 | Natronomonas                  | 0      | 1     | 0      | 0   | 0       | 1      |
| 3        | 0.1.2.4         | Methanococci                  | 1      | 1     | 0      | 0   | 0       | 1      |
| 4        | 0.1.2.4.1       | Methanococcales               | 1      | 1     | 0      | 0   | 0       | 1      |
| 5        | 0.1.2.4.1.1     | Methanocaldococcaceae         | 1      | 1     | 0      | 0   | 0       | 1      |
| 6        | 0.1.2.4.1.1.1   | Methanotorris                 | 0      | 1     | 0      | 0   | 0       | 1      |
| 3        | 0.1.2.5         | Methanopyri                   | 1      | 1     | 0      | 0   | 0       | 1      |
| 4        | 0.1.2.5.1       | Methanopyrales                | 1      | 1     | 0      | 0   | 0       | 1      |
| 5        | 0.1.2.5.1.1     | Methanopyraceae               | 1      | 1     | 0      | 0   | 0       | 1      |
| 6        | 0.1.2.5.1.1.1   | Methanopyrus                  | 0      | 1     | 0      | 0   | 0       | 1      |
| 3        | 0.1.2.6         | Thermoplasmata                | 1      | 2     | 0      | 0   | 0       | 2      |
| 4        | 0.1.2.6.1       | Thermoplasmatales             | 2      | 2     | 0      | 0   | 0       | 2      |
| 5        | 0.1.2.6.1.1     | Picrophilaceae                | 1      | 1     | 0      | 0   | 0       | 1      |
| 6        | 0.1.2.6.1.1.1   | Picrophilus                   | 0      | 1     | 0      | 0   | 0       | 1      |
| 5        | 0.1.2.6.1.2     | Thermoplasmatales_incertae_se | 1      | 1     | 0      | 0   | 0       | 1      |
| 6        | 0.1.2.6.1.2.1   | Thermogymnomonas              | 0      | 1     | 0      | 0   | 0       | 1      |
| 1        | 0,2             | Bacteria                      | 25     | 633   | 93     | 82  | 519     | 104    |
| 2        | 0.2.1           | Acidobacteria                 | 8      | 10    | 2      | 0   | 9       | 0      |
| 3        | 0.2.1.1         | Acidobacteria_Gp1             | 1      | 1     | 0      | 0   | 1       | 0      |
| 4        | 0.2.1.1.1       | unclassified                  | 1      | 1     | 0      | 0   | 1       | 0      |
| 5        | 0.2.1.1.1.1     | unclassified                  | 1      | 1     | 0      | 0   | 1       | 0      |
| 6        | 0.2.1.1.1.1.1   | unclassified                  | 0      | 1     | 0      | 0   | 1       | 0      |
| 3        | 0.2.1.2         | Acidobacteria_Gp10            | 1      | 1     | 0      | 0   | 1       | 0      |
| 4        | 0.2.1.2.1       | unclassified                  | 1      | 1     | 0      | 0   | 1       | 0      |

|   |                |                                |    |    |   |    |    |    |
|---|----------------|--------------------------------|----|----|---|----|----|----|
| 5 | 0.2.1.2.1.1    | unclassified                   | 1  | 1  | 0 | 0  | 1  | 0  |
| 6 | 0.2.1.2.1.1.1  | unclassified                   | 0  | 1  | 0 | 0  | 1  | 0  |
| 3 | 0.2.1.3        | Acidobacteria_Gp21             | 1  | 1  | 0 | 0  | 1  | 0  |
| 4 | 0.2.1.3.1      | unclassified                   | 1  | 1  | 0 | 0  | 1  | 0  |
| 5 | 0.2.1.3.1.1    | unclassified                   | 1  | 1  | 0 | 0  | 1  | 0  |
| 6 | 0.2.1.3.1.1.1  | unclassified                   | 0  | 1  | 0 | 0  | 1  | 0  |
| 3 | 0.2.1.4        | Acidobacteria_Gp22             | 1  | 1  | 0 | 0  | 1  | 0  |
| 4 | 0.2.1.4.1      | unclassified                   | 1  | 1  | 0 | 0  | 1  | 0  |
| 5 | 0.2.1.4.1.1    | unclassified                   | 1  | 1  | 0 | 0  | 1  | 0  |
| 6 | 0.2.1.4.1.1.1  | unclassified                   | 0  | 1  | 0 | 0  | 1  | 0  |
| 3 | 0.2.1.5        | Acidobacteria_Gp3              | 1  | 1  | 1 | 0  | 1  | 0  |
| 4 | 0.2.1.5.1      | unclassified                   | 1  | 1  | 1 | 0  | 1  | 0  |
| 5 | 0.2.1.5.1.1    | unclassified                   | 1  | 1  | 1 | 0  | 1  | 0  |
| 6 | 0.2.1.5.1.1.1  | unclassified                   | 0  | 1  | 1 | 0  | 1  | 0  |
| 3 | 0.2.1.6        | Acidobacteria_Gp4              | 1  | 1  | 1 | 0  | 0  | 0  |
| 4 | 0.2.1.6.1      | unclassified                   | 1  | 1  | 1 | 0  | 0  | 0  |
| 5 | 0.2.1.6.1.1    | unclassified                   | 1  | 1  | 1 | 0  | 0  | 0  |
| 6 | 0.2.1.6.1.1.1  | unclassified                   | 0  | 1  | 1 | 0  | 0  | 0  |
| 3 | 0.2.1.7        | Acidobacteria_Gp7              | 1  | 1  | 0 | 0  | 1  | 0  |
| 4 | 0.2.1.7.1      | unclassified                   | 1  | 1  | 0 | 0  | 1  | 0  |
| 5 | 0.2.1.7.1.1    | unclassified                   | 1  | 1  | 0 | 0  | 1  | 0  |
| 6 | 0.2.1.7.1.1.1  | unclassified                   | 0  | 1  | 0 | 0  | 1  | 0  |
| 3 | 0.2.1.8        | Holophagae                     | 2  | 3  | 0 | 0  | 3  | 0  |
| 4 | 0.2.1.8.1      | Acanthopleuribacteriales       | 1  | 1  | 0 | 0  | 1  | 0  |
| 5 | 0.2.1.8.1.1    | Acanthopleuribacteraceae       | 1  | 1  | 0 | 0  | 1  | 0  |
| 6 | 0.2.1.8.1.1.1  | Acanthopleuribacter            | 0  | 1  | 0 | 0  | 1  | 0  |
| 4 | 0.2.1.8.2      | Holophagales                   | 1  | 2  | 0 | 0  | 2  | 0  |
| 5 | 0.2.1.8.2.1    | Holophagaceae                  | 2  | 2  | 0 | 0  | 2  | 0  |
| 6 | 0.2.1.8.2.1.1  | Geothrix                       | 0  | 1  | 0 | 0  | 1  | 0  |
| 6 | 0.2.1.8.2.1.2  | Holophaga                      | 0  | 1  | 0 | 0  | 1  | 0  |
| 2 | 0.2.2          | Actinobacteria                 | 1  | 67 | 1 | 30 | 39 | 13 |
| 3 | 0.2.2.1        | Actinobacteria                 | 7  | 67 | 1 | 30 | 39 | 13 |
| 4 | 0.2.2.1.1      | Acidimicrobiales               | 2  | 3  | 0 | 2  | 1  | 1  |
| 5 | 0.2.2.1.1.1    | Acidimicrobiaceae              | 2  | 2  | 0 | 1  | 0  | 1  |
| 6 | 0.2.2.1.1.1.1  | Acidimicrobium                 | 0  | 0  | 0 | 0  | 0  | 1  |
| 6 | 0.2.2.1.1.1.2  | Ferrithrix                     | 0  | 1  | 0 | 1  | 0  | 0  |
| 5 | 0.2.2.1.1.2    | Iamiaceae                      | 1  | 1  | 0 | 1  | 1  | 0  |
| 6 | 0.2.2.1.1.2.1  | Iamia                          | 0  | 1  | 0 | 1  | 1  | 0  |
| 4 | 0.2.2.1.2      | Actinobacteria_order_incertae_ | 1  | 1  | 0 | 1  | 1  | 0  |
| 5 | 0.2.2.1.2.1    | Acidimicrobidae_incertae_sedis | 1  | 1  | 0 | 1  | 1  | 0  |
| 6 | 0.2.2.1.2.1.1  | Illumatobacter                 | 0  | 1  | 0 | 1  | 1  | 0  |
| 4 | 0.2.2.1.3      | Actinomycetales                | 24 | 50 | 1 | 23 | 33 | 2  |
| 5 | 0.2.2.1.3.1    | Acidothermaceae                | 1  | 1  | 0 | 0  | 1  | 0  |
| 6 | 0.2.2.1.3.1.1  | Acidothermus                   | 0  | 1  | 0 | 0  | 1  | 0  |
| 5 | 0.2.2.1.3.2    | Actinosynnemataceae            | 1  | 1  | 0 | 1  | 0  | 0  |
| 6 | 0.2.2.1.3.2.1  | Umezawaea                      | 0  | 1  | 0 | 1  | 0  | 0  |
| 5 | 0.2.2.1.3.3    | Catenulisporaceae              | 1  | 1  | 0 | 0  | 1  | 0  |
| 6 | 0.2.2.1.3.3.1  | Catenulispora                  | 0  | 1  | 0 | 0  | 1  | 0  |
| 5 | 0.2.2.1.3.4    | Cellulomonadaceae              | 1  | 1  | 0 | 1  | 1  | 0  |
| 6 | 0.2.2.1.3.4.1  | Actinotalea                    | 0  | 1  | 0 | 1  | 1  | 0  |
| 5 | 0.2.2.1.3.5    | Cryptosporangiaceae            | 1  | 1  | 0 | 1  | 0  | 0  |
| 6 | 0.2.2.1.3.5.1  | Cryptosporangium               | 0  | 1  | 0 | 1  | 0  | 0  |
| 5 | 0.2.2.1.3.6    | Dietziaceae                    | 1  | 1  | 0 | 1  | 0  | 0  |
| 6 | 0.2.2.1.3.6.1  | Dietzia                        | 0  | 1  | 0 | 1  | 0  | 0  |
| 5 | 0.2.2.1.3.7    | Frankineae_incertae_sedis      | 1  | 1  | 0 | 0  | 1  | 0  |
| 6 | 0.2.2.1.3.7.1  | Fodinicola                     | 0  | 1  | 0 | 0  | 1  | 0  |
| 5 | 0.2.2.1.3.8    | Geodermatophilaceae            | 1  | 1  | 0 | 1  | 1  | 0  |
| 6 | 0.2.2.1.3.8.1  | Blastococcus                   | 0  | 1  | 0 | 1  | 1  | 0  |
| 5 | 0.2.2.1.3.9    | Glycomycetaceae                | 1  | 1  | 0 | 0  | 1  | 0  |
| 6 | 0.2.2.1.3.9.1  | Haloglycomyces                 | 0  | 1  | 0 | 0  | 1  | 0  |
| 5 | 0.2.2.1.3.10   | Intrasporangiaceae             | 1  | 1  | 0 | 0  | 1  | 0  |
| 6 | 0.2.2.1.3.10.1 | Lapillicoccus                  | 0  | 1  | 0 | 0  | 1  | 0  |
| 5 | 0.2.2.1.3.11   | Microbacteriaceae              | 3  | 3  | 0 | 0  | 1  | 2  |
| 6 | 0.2.2.1.3.11.1 | Glaciibacter                   | 0  | 0  | 0 | 0  | 0  | 1  |
| 6 | 0.2.2.1.3.11.2 | Leifsonia                      | 0  | 1  | 0 | 0  | 1  | 0  |
| 6 | 0.2.2.1.3.11.3 | Okibacterium                   | 0  | 1  | 0 | 0  | 0  | 1  |
| 5 | 0.2.2.1.3.12   | Micrococcaceae                 | 2  | 2  | 0 | 2  | 0  | 0  |
| 6 | 0.2.2.1.3.12.1 | Micrococcus                    | 0  | 1  | 0 | 1  | 0  | 0  |
| 6 | 0.2.2.1.3.12.2 | Rothia                         | 0  | 1  | 0 | 1  | 0  | 0  |
| 5 | 0.2.2.1.3.13   | Micromonosporaceae             | 11 | 11 | 1 | 7  | 8  | 0  |
| 6 | 0.2.2.1.3.13.1 | Actinoplanes                   | 0  | 1  | 0 | 1  | 0  | 0  |
| 6 | 0.2.2.1.3.13.2 | Asanoa                         | 0  | 1  | 0 | 0  | 1  | 0  |
| 6 | 0.2.2.1.3.13.3 | Catellatospora                 | 0  | 1  | 0 | 1  | 1  | 0  |
| 6 | 0.2.2.1.3.13.4 | Dactylosporangium              | 0  | 1  | 0 | 1  | 0  | 0  |
| 6 | 0.2.2.1.3.13.5 | Krasilnikovia                  | 0  | 1  | 0 | 0  | 1  | 0  |
| 6 | 0.2.2.1.3.13.6 | Longispora                     | 0  | 1  | 0 | 1  | 1  | 0  |
| 6 | 0.2.2.1.3.13.7 | Luedemannella                  | 0  | 1  | 1 | 1  | 1  | 0  |
| 6 | 0.2.2.1.3.13.8 | Pilimelia                      | 0  | 1  | 0 | 1  | 1  | 0  |
| 6 | 0.2.2.1.3.13.9 | Planosporangium                | 0  | 1  | 0 | 0  | 1  | 0  |
| 6 | 0.2.2.1.3.13.1 | Spirilliplanes                 | 0  | 1  | 0 | 1  | 0  | 0  |
| 6 | 0.2.2.1.3.13.1 | Verrucosispora                 | 0  | 1  | 0 | 0  | 1  | 0  |
| 5 | 0.2.2.1.3.14   | Mycobacteriaceae               | 1  | 1  | 0 | 1  | 0  | 0  |
| 6 | 0.2.2.1.3.14.1 | Mycobacterium                  | 0  | 1  | 0 | 1  | 0  | 0  |
| 5 | 0.2.2.1.3.15   | Nakamurellaceae                | 1  | 1  | 0 | 0  | 1  | 0  |
| 6 | 0.2.2.1.3.15.1 | Humicoccus                     | 0  | 1  | 0 | 0  | 1  | 0  |
| 5 | 0.2.2.1.3.16   | Nocardiaceae                   | 3  | 3  | 0 | 1  | 2  | 0  |
| 6 | 0.2.2.1.3.16.1 | Millisia                       | 0  | 1  | 0 | 0  | 1  | 0  |

|   |                |                                    |    |    |   |   |    |    |
|---|----------------|------------------------------------|----|----|---|---|----|----|
| 6 | 0.2.2.1.3.16.2 | Rhodococcus                        | 0  | 1  | 0 | 1 | 0  | 0  |
| 6 | 0.2.2.1.3.16.3 | Smaragdicooccus                    | 0  | 1  | 0 | 0 | 1  | 0  |
| 5 | 0.2.2.1.3.17   | Promicromonosporaceae              | 1  | 1  | 0 | 0 | 1  | 0  |
| 6 | 0.2.2.1.3.17.1 | Xylanimicrobium                    | 0  | 1  | 0 | 0 | 1  | 0  |
| 5 | 0.2.2.1.3.18   | Propionibacteriaceae               | 5  | 5  | 0 | 1 | 4  | 0  |
| 6 | 0.2.2.1.3.18.1 | Aestuariimicrobium                 | 0  | 1  | 0 | 0 | 1  | 0  |
| 6 | 0.2.2.1.3.18.2 | Brooklawnia                        | 0  | 1  | 0 | 0 | 1  | 0  |
| 6 | 0.2.2.1.3.18.3 | Granulicoccus                      | 0  | 1  | 0 | 1 | 0  | 0  |
| 6 | 0.2.2.1.3.18.4 | Propionibacterium                  | 0  | 1  | 0 | 0 | 1  | 0  |
| 6 | 0.2.2.1.3.18.5 | Propionicicella                    | 0  | 1  | 0 | 0 | 1  | 0  |
| 5 | 0.2.2.1.3.19   | Pseudonocardiaceae                 | 7  | 7  | 0 | 4 | 4  | 0  |
| 6 | 0.2.2.1.3.19.1 | Actinomycetospora                  | 0  | 1  | 0 | 0 | 1  | 0  |
| 6 | 0.2.2.1.3.19.2 | Allokutzneria                      | 0  | 1  | 0 | 1 | 0  | 0  |
| 6 | 0.2.2.1.3.19.3 | Kibdelosporangium                  | 0  | 1  | 0 | 0 | 1  | 0  |
| 6 | 0.2.2.1.3.19.4 | Pseudonocardia                     | 0  | 1  | 0 | 1 | 1  | 0  |
| 6 | 0.2.2.1.3.19.5 | Streptoalloteichus                 | 0  | 1  | 0 | 1 | 0  | 0  |
| 6 | 0.2.2.1.3.19.6 | Thermobispora                      | 0  | 1  | 0 | 1 | 0  | 0  |
| 6 | 0.2.2.1.3.19.7 | Thermocrisum                       | 0  | 1  | 0 | 0 | 1  | 0  |
| 5 | 0.2.2.1.3.20   | Sporichthyaceae                    | 1  | 1  | 0 | 1 | 1  | 0  |
| 6 | 0.2.2.1.3.20.1 | Sporichthya                        | 0  | 1  | 0 | 1 | 1  | 0  |
| 5 | 0.2.2.1.3.21   | Streptomycetaceae                  | 2  | 2  | 0 | 0 | 2  | 0  |
| 6 | 0.2.2.1.3.21.1 | Kitasatospora                      | 0  | 1  | 0 | 0 | 1  | 0  |
| 6 | 0.2.2.1.3.21.2 | Streptomyces                       | 0  | 1  | 0 | 0 | 1  | 0  |
| 5 | 0.2.2.1.3.22   | Streptosporangiaceae               | 1  | 1  | 0 | 1 | 0  | 0  |
| 6 | 0.2.2.1.3.22.1 | Planomonospora                     | 0  | 1  | 0 | 1 | 0  | 0  |
| 5 | 0.2.2.1.3.23   | Thermomonosporaceae                | 1  | 1  | 0 | 0 | 1  | 0  |
| 6 | 0.2.2.1.3.23.1 | Spirillospora                      | 0  | 1  | 0 | 0 | 1  | 0  |
| 5 | 0.2.2.1.3.24   | Tsukamurellaceae                   | 1  | 1  | 0 | 0 | 1  | 0  |
| 6 | 0.2.2.1.3.24.1 | Tsukamurella                       | 0  | 1  | 0 | 0 | 1  | 0  |
| 4 | 0.2.2.1.4      | Bifidobacteriales                  | 1  | 2  | 0 | 0 | 0  | 2  |
| 5 | 0.2.2.1.4.1    | Bifidobacteriaceae                 | 2  | 2  | 0 | 0 | 0  | 2  |
| 6 | 0.2.2.1.4.1.1  | Aeriscardovia                      | 0  | 1  | 0 | 0 | 0  | 1  |
| 6 | 0.2.2.1.4.1.2  | Scardovia                          | 0  | 1  | 0 | 0 | 0  | 1  |
| 4 | 0.2.2.1.5      | Coriobacteriales                   | 1  | 7  | 0 | 2 | 0  | 7  |
| 5 | 0.2.2.1.5.1    | Coriobacteriaceae                  | 7  | 7  | 0 | 2 | 0  | 7  |
| 6 | 0.2.2.1.5.1.1  | Adlercreutzia                      | 0  | 1  | 0 | 0 | 0  | 1  |
| 6 | 0.2.2.1.5.1.2  | Asaccharobacter                    | 0  | 1  | 0 | 0 | 0  | 1  |
| 6 | 0.2.2.1.5.1.3  | Coriobacterium                     | 0  | 1  | 0 | 1 | 0  | 1  |
| 6 | 0.2.2.1.5.1.4  | Cryptobacterium                    | 0  | 1  | 0 | 0 | 0  | 1  |
| 6 | 0.2.2.1.5.1.5  | Enterorhabdus                      | 0  | 1  | 0 | 0 | 0  | 1  |
| 6 | 0.2.2.1.5.1.6  | Gordonibacter                      | 0  | 1  | 0 | 0 | 0  | 1  |
| 6 | 0.2.2.1.5.1.7  | Paraeggerthella                    | 0  | 1  | 0 | 1 | 0  | 1  |
| 4 | 0.2.2.1.6      | Nitriliruptorales                  | 1  | 1  | 0 | 1 | 1  | 1  |
| 5 | 0.2.2.1.6.1    | Nitriliruptoraceae                 | 1  | 1  | 0 | 1 | 1  | 1  |
| 6 | 0.2.2.1.6.1.1  | Nitriliruptor                      | 0  | 1  | 0 | 1 | 1  | 1  |
| 4 | 0.2.2.1.7      | Solirubrobacteriales               | 3  | 3  | 0 | 1 | 3  | 0  |
| 5 | 0.2.2.1.7.1    | Conexibacteraceae                  | 1  | 1  | 0 | 1 | 1  | 0  |
| 6 | 0.2.2.1.7.1.1  | Conexibacter                       | 0  | 1  | 0 | 1 | 1  | 0  |
| 5 | 0.2.2.1.7.2    | Patulibacteraceae                  | 1  | 1  | 0 | 0 | 1  | 0  |
| 6 | 0.2.2.1.7.2.1  | Patulibacter                       | 0  | 1  | 0 | 0 | 1  | 0  |
| 5 | 0.2.2.1.7.3    | Solirubrobacteraceae               | 1  | 1  | 0 | 0 | 1  | 0  |
| 6 | 0.2.2.1.7.3.1  | Solirubrobacter                    | 0  | 1  | 0 | 0 | 1  | 0  |
| 2 | 0.2.3          | Aquificae                          | 1  | 4  | 0 | 3 | 1  | 2  |
| 3 | 0.2.3.1        | Aquificae                          | 1  | 4  | 0 | 3 | 1  | 2  |
| 4 | 0.2.3.1.1      | Aquificales                        | 3  | 4  | 0 | 3 | 1  | 2  |
| 5 | 0.2.3.1.1.1    | Aquificaceae                       | 2  | 2  | 0 | 1 | 0  | 1  |
| 6 | 0.2.3.1.1.1.1  | Aquifex                            | 0  | 1  | 0 | 0 | 0  | 1  |
| 6 | 0.2.3.1.1.1.2  | Hydrogenobaculum                   | 0  | 1  | 0 | 1 | 0  | 0  |
| 5 | 0.2.3.1.1.2    | Aquificales_incertae_sedis         | 1  | 1  | 0 | 1 | 1  | 0  |
| 6 | 0.2.3.1.1.2.1  | Thermosulfidibacter                | 0  | 1  | 0 | 1 | 1  | 0  |
| 5 | 0.2.3.1.1.3    | Desulfurobacteriaceae              | 1  | 1  | 0 | 1 | 0  | 1  |
| 6 | 0.2.3.1.1.3.1  | Balnearium                         | 0  | 1  | 0 | 1 | 0  | 1  |
| 2 | 0.2.4          | Bacteroidetes                      | 4  | 70 | 7 | 3 | 58 | 18 |
| 3 | 0.2.4.1        | Bacteroidetes_class_incertae_sedis | 1  | 1  | 0 | 1 | 0  | 1  |
| 4 | 0.2.4.1.1      | Bacteroidetes_order_incertae_sedis | 1  | 1  | 0 | 0 | 1  | 1  |
| 5 | 0.2.4.1.1.1    | Bacteroidetes_incertae_sedis       | 1  | 1  | 0 | 0 | 1  | 1  |
| 6 | 0.2.4.1.1.1.1  | Fulvivirga                         | 0  | 1  | 0 | 0 | 1  | 1  |
| 3 | 0.2.4.2        | Bacteroidia                        | 1  | 6  | 0 | 1 | 1  | 5  |
| 4 | 0.2.4.2.1      | Bacteroidales                      | 5  | 6  | 0 | 1 | 1  | 5  |
| 5 | 0.2.4.2.1.1    | Marinilabiaceae                    | 1  | 1  | 0 | 1 | 0  | 1  |
| 6 | 0.2.4.2.1.1.1  | Anaerophaga                        | 0  | 1  | 0 | 1 | 0  | 1  |
| 5 | 0.2.4.2.1.2    | Porphyromonadaceae                 | 1  | 1  | 0 | 0 | 0  | 1  |
| 6 | 0.2.4.2.1.2.1  | Petrimonas                         | 0  | 1  | 0 | 0 | 0  | 1  |
| 5 | 0.2.4.2.1.3    | Prevotellaceae                     | 2  | 2  | 0 | 0 | 0  | 2  |
| 6 | 0.2.4.2.1.3.1  | Hallella                           | 0  | 1  | 0 | 0 | 0  | 1  |
| 6 | 0.2.4.2.1.3.2  | Xylanibacter                       | 0  | 1  | 0 | 0 | 0  | 1  |
| 5 | 0.2.4.2.1.4    | Rikenellaceae                      | 1  | 1  | 0 | 0 | 1  | 0  |
| 6 | 0.2.4.2.1.4.1  | Rikenella                          | 0  | 1  | 0 | 0 | 1  | 0  |
| 5 | 0.2.4.2.1.5    | Bacteroidales_incertae_sedis       | 1  | 1  | 0 | 0 | 0  | 1  |
| 6 | 0.2.4.2.1.5.1  | Phocaeicola                        | 0  | 1  | 0 | 0 | 0  | 1  |
| 3 | 0.2.4.3        | Sphingobacteria                    | 1  | 49 | 6 | 0 | 46 | 7  |
| 4 | 0.2.4.3.1      | Sphingobacteriales                 | 7  | 49 | 6 | 0 | 46 | 7  |
| 5 | 0.2.4.3.1.1    | Chitinophagaceae                   | 13 | 13 | 2 | 0 | 13 | 2  |
| 6 | 0.2.4.3.1.1.1  | Balneola                           | 0  | 1  | 0 | 0 | 1  | 0  |
| 6 | 0.2.4.3.1.1.2  | Chitinophaga                       | 0  | 1  | 0 | 0 | 1  | 0  |
| 6 | 0.2.4.3.1.1.3  | Ferruginibacter                    | 0  | 1  | 0 | 0 | 1  | 0  |
| 6 | 0.2.4.3.1.1.4  | Filimonas                          | 0  | 1  | 0 | 0 | 1  | 0  |

|   |                |                        |    |    |   |    |    |   |
|---|----------------|------------------------|----|----|---|----|----|---|
| 6 | 0.2.4.3.1.1.5  | Flavisolibacter        | 0  | 1  | 0 | 0  | 1  | 0 |
| 6 | 0.2.4.3.1.1.6  | Gracilimonas           | 0  | 1  | 0 | 0  | 1  | 1 |
| 6 | 0.2.4.3.1.1.7  | Lacibacter             | 0  | 1  | 0 | 0  | 1  | 0 |
| 6 | 0.2.4.3.1.1.8  | Niabella               | 0  | 1  | 0 | 0  | 1  | 0 |
| 6 | 0.2.4.3.1.1.9  | Niastella              | 0  | 1  | 1 | 0  | 1  | 0 |
| 6 | 0.2.4.3.1.1.10 | Parasegetibacter       | 0  | 1  | 0 | 0  | 1  | 0 |
| 6 | 0.2.4.3.1.1.11 | Sediminibacterium      | 0  | 1  | 0 | 0  | 1  | 1 |
| 6 | 0.2.4.3.1.1.12 | Segetibacter           | 0  | 1  | 0 | 0  | 1  | 0 |
| 6 | 0.2.4.3.1.1.13 | Terrimonas             | 0  | 1  | 1 | 0  | 1  | 0 |
| 5 | 0.2.4.3.1.2    | Cyclobacteriaceae      | 3  | 3  | 1 | 2  | 2  | 0 |
| 6 | 0.2.4.3.1.2.1  | Aquiflexum             | 0  | 1  | 1 | 0  | 0  | 0 |
| 6 | 0.2.4.3.1.2.2  | Belliella              | 0  | 1  | 0 | 0  | 1  | 0 |
| 6 | 0.2.4.3.1.2.3  | Cyclobacterium         | 0  | 1  | 0 | 0  | 1  | 0 |
| 5 | 0.2.4.3.1.3    | Flammeovirgaceae       | 9  | 9  | 0 | 9  | 9  | 0 |
| 6 | 0.2.4.3.1.3.1  | Fabibacter             | 0  | 1  | 0 | 0  | 1  | 0 |
| 6 | 0.2.4.3.1.3.2  | Flexithrix             | 0  | 1  | 0 | 0  | 1  | 0 |
| 6 | 0.2.4.3.1.3.3  | Limibacter             | 0  | 1  | 0 | 0  | 1  | 0 |
| 6 | 0.2.4.3.1.3.4  | Marinoscillum          | 0  | 1  | 0 | 0  | 1  | 0 |
| 6 | 0.2.4.3.1.3.5  | Perexilibacter         | 0  | 1  | 0 | 0  | 1  | 0 |
| 6 | 0.2.4.3.1.3.6  | Persicobacter          | 0  | 1  | 0 | 0  | 1  | 0 |
| 6 | 0.2.4.3.1.3.7  | Rapidithrix            | 0  | 1  | 0 | 0  | 1  | 0 |
| 6 | 0.2.4.3.1.3.8  | Reichenbachiella       | 0  | 1  | 0 | 0  | 1  | 0 |
| 6 | 0.2.4.3.1.3.9  | Roseivirga             | 0  | 1  | 0 | 0  | 1  | 0 |
| 5 | 0.2.4.3.1.4    | Rhodothermaceae        | 3  | 3  | 0 | 2  | 3  | 3 |
| 6 | 0.2.4.3.1.4.1  | Rhodothermus           | 0  | 1  | 0 | 0  | 1  | 1 |
| 6 | 0.2.4.3.1.4.2  | Salinibacter           | 0  | 1  | 0 | 0  | 0  | 1 |
| 6 | 0.2.4.3.1.4.3  | Salisaeta              | 1  | 1  | 0 | 0  | 1  | 1 |
| 5 | 0.2.4.3.1.5    | Saprosiraceae          | 2  | 2  | 1 | 2  | 2  | 0 |
| 6 | 0.2.4.3.1.5.1  | Aureispira             | 0  | 1  | 0 | 0  | 1  | 0 |
| 6 | 0.2.4.3.1.5.2  | Haliscomenobacter      | 0  | 1  | 0 | 0  | 1  | 0 |
| 5 | 0.2.4.3.1.6    | Cytophagaceae          | 14 | 14 | 2 | 14 | 14 | 1 |
| 6 | 0.2.4.3.1.6.1  | Arcicella              | 0  | 1  | 0 | 0  | 1  | 0 |
| 6 | 0.2.4.3.1.6.2  | Cytophaga              | 0  | 1  | 0 | 0  | 1  | 0 |
| 6 | 0.2.4.3.1.6.3  | Dyadobacter            | 0  | 1  | 0 | 0  | 1  | 0 |
| 6 | 0.2.4.3.1.6.4  | Effluviibacter         | 0  | 1  | 0 | 0  | 1  | 0 |
| 6 | 0.2.4.3.1.6.5  | Emticicia              | 0  | 1  | 0 | 0  | 1  | 0 |
| 6 | 0.2.4.3.1.6.6  | Flexibacter            | 0  | 1  | 0 | 0  | 1  | 0 |
| 6 | 0.2.4.3.1.6.7  | Hymenobacter           | 0  | 1  | 1 | 0  | 1  | 0 |
| 6 | 0.2.4.3.1.6.8  | Larkinella             | 0  | 1  | 0 | 0  | 1  | 0 |
| 6 | 0.2.4.3.1.6.9  | Leadbetterella         | 0  | 1  | 0 | 0  | 1  | 0 |
| 6 | 0.2.4.3.1.6.10 | Microscilla            | 0  | 1  | 0 | 0  | 1  | 0 |
| 6 | 0.2.4.3.1.6.11 | Pontibacter            | 0  | 1  | 0 | 0  | 1  | 0 |
| 6 | 0.2.4.3.1.6.12 | Rhodonellum            | 0  | 1  | 0 | 0  | 1  | 0 |
| 6 | 0.2.4.3.1.6.13 | Rudanella              | 0  | 1  | 0 | 0  | 1  | 0 |
| 6 | 0.2.4.3.1.6.14 | Sporocytophaga         | 0  | 1  | 1 | 0  | 1  | 1 |
| 5 | 0.2.4.3.1.7    | Sphingobacteriaceae    | 5  | 5  | 0 | 4  | 5  | 1 |
| 6 | 0.2.4.3.1.7.1  | Mucilagibacter         | 0  | 1  | 0 | 0  | 1  | 0 |
| 6 | 0.2.4.3.1.7.2  | Nubsella               | 0  | 1  | 0 | 0  | 1  | 0 |
| 6 | 0.2.4.3.1.7.3  | Pedobacter             | 0  | 1  | 0 | 0  | 1  | 0 |
| 6 | 0.2.4.3.1.7.4  | Pseudosphingobacterium | 0  | 1  | 0 | 0  | 0  | 1 |
| 6 | 0.2.4.3.1.7.5  | Solitalea              | 0  | 1  | 0 | 0  | 1  | 0 |
| 3 | 0.2.4.4        | Flavobacteria          | 1  | 14 | 1 | 2  | 10 | 5 |
| 4 | 0.2.4.4.1      | Flavobacteriales       | 2  | 14 | 1 | 2  | 10 | 5 |
| 5 | 0.2.4.4.1.1    | Cryomorphaceae         | 6  | 6  | 1 | 5  | 5  | 2 |
| 6 | 0.2.4.4.1.1.1  | Brumimicrobium         | 0  | 1  | 0 | 0  | 1  | 0 |
| 6 | 0.2.4.4.1.1.2  | Crocinitomix           | 0  | 1  | 0 | 0  | 1  | 0 |
| 6 | 0.2.4.4.1.1.3  | Cryomorpha             | 0  | 1  | 0 | 0  | 1  | 0 |
| 6 | 0.2.4.4.1.1.4  | Fluviicola             | 0  | 1  | 0 | 0  | 1  | 1 |
| 6 | 0.2.4.4.1.1.5  | Lishizhenia            | 0  | 1  | 1 | 0  | 0  | 1 |
| 6 | 0.2.4.4.1.1.6  | Owenweesia             | 0  | 1  | 0 | 0  | 1  | 0 |
| 5 | 0.2.4.4.1.2    | Flavobacteriaceae      | 8  | 8  | 0 | 2  | 5  | 3 |
| 6 | 0.2.4.4.1.2.1  | Coenonia               | 0  | 1  | 0 | 0  | 1  | 0 |
| 6 | 0.2.4.4.1.2.2  | Costertonia            | 0  | 1  | 0 | 1  | 0  | 1 |
| 6 | 0.2.4.4.1.2.3  | Flagellimonas          | 0  | 1  | 0 | 0  | 0  | 1 |
| 6 | 0.2.4.4.1.2.4  | Flavobacterium         | 0  | 1  | 0 | 0  | 1  | 0 |
| 6 | 0.2.4.4.1.2.5  | Lutimonas              | 0  | 1  | 0 | 0  | 1  | 0 |
| 6 | 0.2.4.4.1.2.6  | Robiginitalea          | 0  | 1  | 0 | 1  | 1  | 0 |
| 6 | 0.2.4.4.1.2.7  | Sandarakinotalea       | 0  | 1  | 0 | 0  | 1  | 0 |
| 6 | 0.2.4.4.1.2.8  | Weeksella              | 0  | 1  | 0 | 0  | 0  | 1 |
| 2 | 0.2.5          | Chlamydiae             | 1  | 4  | 0 | 1  | 4  | 0 |
| 3 | 0.2.5.1        | Chlamydiae             | 1  | 4  | 0 | 1  | 4  | 0 |
| 4 | 0.2.5.1.1      | Chlamydiales           | 3  | 4  | 0 | 1  | 4  | 0 |
| 5 | 0.2.5.1.1.1    | Parachlamydiaceae      | 2  | 2  | 0 | 1  | 2  | 0 |
| 6 | 0.2.5.1.1.1.1  | Neochlamydia           | 0  | 1  | 0 | 1  | 1  | 0 |
| 6 | 0.2.5.1.1.1.2  | Parachlamydia          | 0  | 1  | 0 | 0  | 1  | 0 |
| 5 | 0.2.5.1.1.2    | Simkaniaceae           | 1  | 1  | 0 | 0  | 1  | 0 |
| 6 | 0.2.5.1.1.2.1  | Simkania               | 0  | 1  | 0 | 0  | 1  | 0 |
| 5 | 0.2.5.1.1.3    | Waddliaceae            | 1  | 1  | 0 | 0  | 1  | 0 |
| 6 | 0.2.5.1.1.3.1  | Waddlia                | 0  | 1  | 0 | 0  | 1  | 0 |
| 2 | 0.2.6          | Chlorobi               | 1  | 2  | 0 | 0  | 0  | 2 |
| 3 | 0.2.6.1        | Chlorobia              | 1  | 2  | 0 | 0  | 0  | 2 |
| 4 | 0.2.6.1.1      | Chlorobiales           | 1  | 2  | 0 | 0  | 0  | 2 |
| 5 | 0.2.6.1.1.1    | Chlorobiaceae          | 2  | 2  | 0 | 0  | 0  | 2 |
| 6 | 0.2.6.1.1.1.1  | Chloroherpeton         | 0  | 1  | 0 | 0  | 0  | 1 |
| 6 | 0.2.6.1.1.1.2  | Prosthecochloris       | 0  | 1  | 0 | 0  | 0  | 1 |
| 2 | 0.2.7          | Chloroflexi            | 4  | 9  | 5 | 3  | 7  | 6 |
| 3 | 0.2.7.1        | Chloroflexi            | 2  | 2  | 1 | 1  | 1  | 2 |

|   |                |                                 |   |    |   |    |    |    |
|---|----------------|---------------------------------|---|----|---|----|----|----|
| 4 | 0.2.7.1.1      | Chloroflexales                  | 1 | 1  | 1 | 1  | 0  | 1  |
| 5 | 0.2.7.1.1.1    | Chloroflexaceae                 | 1 | 1  | 1 | 1  | 0  | 1  |
| 6 | 0.2.7.1.1.1.1  | Chloroflexus                    | 0 | 1  | 1 | 1  | 0  | 1  |
| 4 | 0.2.7.1.2      | Herpetosiphonales               | 1 | 1  | 0 | 0  | 1  | 1  |
| 5 | 0.2.7.1.2.1    | Herpetosiphonaceae              | 1 | 1  | 0 | 0  | 1  | 1  |
| 6 | 0.2.7.1.2.1.1  | Herpetosiphon                   | 0 | 1  | 0 | 0  | 1  | 1  |
| 3 | 0.2.7.2        | Anaerolineae                    | 1 | 4  | 3 | 1  | 4  | 1  |
| 4 | 0.2.7.2.1      | Anaerolineales                  | 1 | 4  | 3 | 1  | 4  | 1  |
| 5 | 0.2.7.2.1.1    | Anaerolineaceae                 | 4 | 4  | 3 | 1  | 4  | 1  |
| 6 | 0.2.7.2.1.1.1  | Bellilinea                      | 0 | 1  | 0 | 0  | 1  | 0  |
| 6 | 0.2.7.2.1.1.2  | Leptolinea                      | 0 | 1  | 1 | 1  | 1  | 0  |
| 6 | 0.2.7.2.1.1.3  | Levilinea                       | 0 | 1  | 1 | 0  | 1  | 0  |
| 6 | 0.2.7.2.1.1.4  | Longilinea                      | 0 | 1  | 1 | 0  | 1  | 1  |
| 3 | 0.2.7.3        | Caldilineae                     | 1 | 1  | 1 | 0  | 1  | 1  |
| 4 | 0.2.7.3.1      | Caldilineales                   | 1 | 1  | 1 | 0  | 1  | 1  |
| 5 | 0.2.7.3.1.1    | Caldilineaceae                  | 1 | 1  | 1 | 0  | 1  | 1  |
| 6 | 0.2.7.3.1.1.1  | Caldilinea                      | 0 | 1  | 1 | 0  | 1  | 1  |
| 3 | 0.2.7.4        | Thermomicrobia                  | 2 | 2  | 0 | 1  | 1  | 2  |
| 4 | 0.2.7.4.1      | Sphaerobacterales               | 1 | 1  | 0 | 0  | 0  | 1  |
| 5 | 0.2.7.4.1.1    | Sphaerobacteraceae              | 1 | 1  | 0 | 0  | 0  | 1  |
| 6 | 0.2.7.4.1.1.1  | Sphaerobacter                   | 0 | 1  | 0 | 0  | 0  | 1  |
| 4 | 0.2.7.4.2      | Thermomicrobiales               | 1 | 1  | 0 | 1  | 1  | 1  |
| 5 | 0.2.7.4.2.1    | Thermomicrobiaceae              | 1 | 1  | 0 | 1  | 1  | 1  |
| 6 | 0.2.7.4.2.1.1  | Thermomicrobium                 | 0 | 1  | 0 | 1  | 1  | 1  |
| 2 | 0.2.8          | Deferribacteres                 | 1 | 5  | 1 | 0  | 4  | 0  |
| 3 | 0.2.8.1        | Deferribacteres                 | 1 | 5  | 1 | 0  | 4  | 0  |
| 4 | 0.2.8.1.1      | Deferribacterales               | 2 | 5  | 1 | 0  | 4  | 0  |
| 5 | 0.2.8.1.1.1    | Deferribacteraceae              | 4 | 4  | 0 | 0  | 4  | 0  |
| 6 | 0.2.8.1.1.1.1  | Calditerrivibrio                | 0 | 1  | 0 | 0  | 1  | 0  |
| 6 | 0.2.8.1.1.1.2  | Denitrovibrio                   | 0 | 1  | 0 | 0  | 1  | 0  |
| 6 | 0.2.8.1.1.1.3  | Flexistipes                     | 0 | 1  | 0 | 0  | 1  | 0  |
| 6 | 0.2.8.1.1.1.4  | Mucispirillum                   | 0 | 1  | 0 | 0  | 1  | 0  |
| 5 | 0.2.8.1.1.2    | Deferribacterales_incertae_sedi | 1 | 1  | 1 | 0  | 0  | 0  |
| 6 | 0.2.8.1.1.2.1  | Caldithrix                      | 0 | 1  | 1 | 0  | 0  | 0  |
| 2 | 0.2.9          | Deinococcus-Thermus             | 1 | 3  | 0 | 0  | 1  | 2  |
| 3 | 0.2.9.1        | Deinococci                      | 2 | 3  | 0 | 0  | 1  | 2  |
| 4 | 0.2.9.1.1      | Deinococcales                   | 1 | 1  | 0 | 0  | 1  | 0  |
| 5 | 0.2.9.1.1.1    | Trueperaceae                    | 1 | 1  | 0 | 0  | 1  | 0  |
| 6 | 0.2.9.1.1.1.1  | Truepera                        | 0 | 1  | 0 | 0  | 1  | 0  |
| 4 | 0.2.9.1.2      | Thermales                       | 1 | 2  | 0 | 0  | 0  | 2  |
| 5 | 0.2.9.1.2.1    | Thermaceae                      | 2 | 2  | 0 | 0  | 0  | 2  |
| 6 | 0.2.9.1.2.1.1  | Marinithermus                   | 0 | 1  | 0 | 0  | 0  | 1  |
| 6 | 0.2.9.1.2.1.2  | Vulcanithermus                  | 0 | 1  | 0 | 0  | 0  | 1  |
| 2 | 0.2.10         | Firmicutes                      | 3 | 55 | 3 | 17 | 30 | 16 |
| 3 | 0.2.10.1       | Bacilli                         | 2 | 18 | 1 | 8  | 12 | 5  |
| 4 | 0.2.10.1.1     | Lactobacillales                 | 5 | 9  | 0 | 4  | 5  | 4  |
| 5 | 0.2.10.1.1.1   | Carnobacteriaceae               | 2 | 2  | 0 | 0  | 0  | 2  |
| 6 | 0.2.10.1.1.1.1 | Atopococcus                     | 0 | 1  | 0 | 0  | 0  | 1  |
| 6 | 0.2.10.1.1.1.2 | Dolosigranulum                  | 0 | 1  | 0 | 0  | 0  | 1  |
| 5 | 0.2.10.1.1.2   | Enterococcaceae                 | 1 | 1  | 0 | 0  | 0  | 1  |
| 6 | 0.2.10.1.1.2.1 | Pilibacter                      | 0 | 1  | 0 | 0  | 0  | 1  |
| 5 | 0.2.10.1.1.3   | Leuconostocaceae                | 1 | 1  | 0 | 1  | 1  | 0  |
| 6 | 0.2.10.1.1.3.1 | Leuconostoc                     | 0 | 1  | 0 | 1  | 1  | 0  |
| 5 | 0.2.10.1.1.4   | Lactobacillaceae                | 2 | 2  | 0 | 2  | 1  | 0  |
| 6 | 0.2.10.1.1.4.1 | Lactobacillus                   | 0 | 1  | 0 | 1  | 1  | 0  |
| 6 | 0.2.10.1.1.4.2 | Paralactobacillus               | 0 | 1  | 0 | 1  | 0  | 0  |
| 5 | 0.2.10.1.1.5   | Streptococcaceae                | 3 | 3  | 0 | 1  | 3  | 1  |
| 6 | 0.2.10.1.1.5.1 | Lactococcus                     | 0 | 1  | 0 | 1  | 1  | 0  |
| 6 | 0.2.10.1.1.5.2 | Lactovum                        | 0 | 1  | 0 | 0  | 1  | 1  |
| 6 | 0.2.10.1.1.5.3 | Streptococcus                   | 0 | 1  | 0 | 0  | 1  | 0  |
| 4 | 0.2.10.1.2     | Bacillales                      | 6 | 9  | 1 | 4  | 7  | 1  |
| 5 | 0.2.10.1.2.1   | Listeriaceae                    | 1 | 1  | 0 | 1  | 1  | 0  |
| 6 | 0.2.10.1.2.1.1 | Brochothrix                     | 0 | 1  | 0 | 1  | 1  | 0  |
| 5 | 0.2.10.1.2.2   | Sporolactobacillaceae           | 1 | 1  | 0 | 1  | 0  | 0  |
| 6 | 0.2.10.1.2.2.1 | Sporolactobacillus              | 0 | 1  | 0 | 1  | 0  | 0  |
| 5 | 0.2.10.1.2.3   | Staphylococcaceae               | 2 | 2  | 0 | 0  | 2  | 0  |
| 6 | 0.2.10.1.2.3.1 | Gemella                         | 0 | 1  | 0 | 0  | 1  | 0  |
| 6 | 0.2.10.1.2.3.2 | Staphylococcus                  | 0 | 1  | 0 | 0  | 1  | 0  |
| 5 | 0.2.10.1.2.4   | Bacillaceae                     | 3 | 3  | 1 | 1  | 2  | 0  |
| 6 | 0.2.10.1.2.4.1 | Bacillus                        | 0 | 1  | 1 | 0  | 1  | 0  |
| 6 | 0.2.10.1.2.4.2 | Saccharococcus                  | 0 | 1  | 0 | 1  | 0  | 0  |
| 6 | 0.2.10.1.2.4.3 | Virgibacillus                   | 0 | 1  | 0 | 0  | 1  | 0  |
| 5 | 0.2.10.1.2.5   | Planococcaceae                  | 1 | 1  | 0 | 0  | 1  | 0  |
| 6 | 0.2.10.1.2.5.1 | Filibacter                      | 0 | 1  | 0 | 0  | 1  | 0  |
| 5 | 0.2.10.1.2.6   | Thermoactinomycetaceae          | 1 | 1  | 0 | 1  | 1  | 1  |
| 6 | 0.2.10.1.2.6.1 | Desmospora                      | 0 | 1  | 0 | 1  | 1  | 1  |
| 3 | 0.2.10.2       | Clostridia                      | 3 | 35 | 2 | 7  | 18 | 9  |
| 4 | 0.2.10.2.1     | Thermoanaerobacterales          | 2 | 6  | 1 | 3  | 1  | 1  |
| 5 | 0.2.10.2.1.1   | Thermoanaerobacteraceae         | 5 | 5  | 1 | 3  | 1  | 0  |
| 6 | 0.2.10.2.1.1.1 | Ammonifex                       | 0 | 1  | 0 | 1  | 0  | 0  |
| 6 | 0.2.10.2.1.1.2 | Caldanaerovirga                 | 0 | 1  | 0 | 1  | 0  | 0  |
| 6 | 0.2.10.2.1.1.3 | Carboxydibrachium               | 0 | 1  | 0 | 1  | 0  | 0  |
| 6 | 0.2.10.2.1.1.4 | Thermanaeromonas                | 0 | 1  | 0 | 0  | 1  | 0  |
| 6 | 0.2.10.2.1.1.5 | Thermovenabulum                 | 0 | 1  | 1 | 0  | 0  | 0  |
| 5 | 0.2.10.2.1.2   | Thermodesulfobiaceae            | 1 | 1  | 0 | 0  | 0  | 1  |
| 6 | 0.2.10.2.1.2.1 | Thermodesulfobium               | 0 | 1  | 0 | 0  | 0  | 1  |
| 4 | 0.2.10.2.2     | Clostridiales                   | 9 | 27 | 1 | 4  | 15 | 8  |

|   |                |                      |    |     |    |    |     |   |
|---|----------------|----------------------|----|-----|----|----|-----|---|
| 5 | 0.2.10.2.2.1   | Lachnospiraceae      | 3  | 3   | 0  | 1  | 0   | 2 |
| 6 | 0.2.10.2.2.1.1 | Johnsonella          | 0  | 1   | 0  | 1  | 0   |   |
| 6 | 0.2.10.2.2.1.2 | Marvinbryantia       | 0  | 1   | 0  | 0  | 1   |   |
| 6 | 0.2.10.2.2.1.3 | Syntrophococcus      | 0  | 1   | 0  | 0  | 1   |   |
| 5 | 0.2.10.2.2.2   | Ruminococcaceae      | 5  | 5   | 0  | 1  | 1   |   |
| 6 | 0.2.10.2.2.2.1 | Acetivibrio          | 0  | 1   | 0  | 0  | 1   |   |
| 6 | 0.2.10.2.2.2.2 | Butyricoccus         | 0  | 1   | 0  | 0  | 1   |   |
| 6 | 0.2.10.2.2.2.3 | Fastidiosipila       | 0  | 1   | 0  | 0  | 1   |   |
| 6 | 0.2.10.2.2.2.4 | Oscillibacter        | 0  | 1   | 0  | 0  | 1   |   |
| 6 | 0.2.10.2.2.2.5 | Papillibacter        | 0  | 1   | 0  | 1  | 0   |   |
| 5 | 0.2.10.2.2.3   | Clostridiaceae       | 5  | 5   | 0  | 1  | 1   |   |
| 6 | 0.2.10.2.2.3.1 | Anoxyinatronum       | 0  | 1   | 0  | 0  | 1   |   |
| 6 | 0.2.10.2.2.3.2 | Caloranaerobacter    | 0  | 1   | 0  | 0  | 1   |   |
| 6 | 0.2.10.2.2.3.3 | Clostridium          | 0  | 1   | 0  | 1  | 0   |   |
| 6 | 0.2.10.2.2.3.4 | Geosporobacter       | 0  | 1   | 0  | 0  | 1   |   |
| 6 | 0.2.10.2.2.3.5 | Natronincola         | 0  | 1   | 0  | 0  | 1   |   |
| 5 | 0.2.10.2.2.4   | Incertae_Sedis_XI    | 4  | 4   | 0  | 0  | 4   |   |
| 6 | 0.2.10.2.2.4.1 | Anaerococcus         | 0  | 1   | 0  | 0  | 1   |   |
| 6 | 0.2.10.2.2.4.2 | Finegoldia           | 0  | 1   | 0  | 0  | 1   |   |
| 6 | 0.2.10.2.2.4.3 | Parvimonas           | 0  | 1   | 0  | 0  | 1   |   |
| 6 | 0.2.10.2.2.4.4 | Peptoniphilus        | 0  | 1   | 0  | 0  | 1   |   |
| 5 | 0.2.10.2.2.5   | Incertae_Sedis_XIII  | 1  | 1   | 0  | 0  | 1   |   |
| 6 | 0.2.10.2.2.5.1 | Anaerovorax          | 0  | 1   | 0  | 0  | 1   |   |
| 5 | 0.2.10.2.2.6   | Incertae_Sedis_XIV   | 2  | 2   | 0  | 0  | 2   |   |
| 6 | 0.2.10.2.2.6.1 | Dethiosulfatibacter  | 0  | 1   | 0  | 0  | 1   |   |
| 6 | 0.2.10.2.2.6.2 | Proteocatella        | 0  | 1   | 0  | 0  | 1   |   |
| 5 | 0.2.10.2.2.7   | Incertae_Sedis_XVIII | 1  | 1   | 0  | 0  | 1   |   |
| 6 | 0.2.10.2.2.7.1 | Symbiobacterium      | 0  | 1   | 0  | 0  | 1   |   |
| 5 | 0.2.10.2.2.8   | Peptococcaceae       | 2  | 2   | 0  | 1  | 1   |   |
| 6 | 0.2.10.2.2.8.1 | Cryptanaerobacter    | 0  | 1   | 0  | 1  | 0   |   |
| 6 | 0.2.10.2.2.8.2 | Desulfurispora       | 0  | 1   | 0  | 0  | 1   |   |
| 5 | 0.2.10.2.2.9   | Veillonellaceae      | 4  | 4   | 1  | 0  | 2   |   |
| 6 | 0.2.10.2.2.9.1 | Anaeroarcus          | 0  | 1   | 1  | 0  | 0   |   |
| 6 | 0.2.10.2.2.9.2 | Anaeromusa           | 0  | 1   | 0  | 0  | 1   |   |
| 6 | 0.2.10.2.2.9.3 | Propionispira        | 0  | 1   | 0  | 0  | 1   |   |
| 6 | 0.2.10.2.2.9.4 | Zymophilus           | 0  | 1   | 0  | 0  | 1   |   |
| 4 | 0.2.10.2.3     | Natranaerobiales     | 1  | 2   | 0  | 0  | 2   |   |
| 5 | 0.2.10.2.3.1   | Natranaerobiaceae    | 2  | 2   | 0  | 0  | 2   |   |
| 6 | 0.2.10.2.3.1.1 | Natranaerobius       | 0  | 1   | 0  | 0  | 1   |   |
| 6 | 0.2.10.2.3.1.2 | Natronovirga         | 0  | 1   | 0  | 0  | 1   |   |
| 3 | 0.2.10.3       | Erysipelotrichi      | 1  | 2   | 0  | 2  | 2   |   |
| 4 | 0.2.10.3.1     | Erysipelotrichales   | 1  | 2   | 0  | 0  | 2   |   |
| 5 | 0.2.10.3.1.1   | Erysipelotrichaceae  | 2  | 2   | 0  | 0  | 2   |   |
| 6 | 0.2.10.3.1.1.1 | Catenibacterium      | 0  | 1   | 0  | 0  | 1   |   |
| 6 | 0.2.10.3.1.1.2 | Sharpea              | 0  | 1   | 0  | 0  | 1   |   |
| 2 | 0.2.11         | Fusobacteria         | 1  | 2   | 0  | 0  | 1   |   |
| 3 | 0.2.11.1       | Fusobacteria         | 1  | 2   | 0  | 0  | 1   |   |
| 4 | 0.2.11.1.1     | Fusobacteriales      | 1  | 2   | 0  | 0  | 1   |   |
| 5 | 0.2.11.1.1.1   | Leptotrichiaceae     | 2  | 2   | 0  | 0  | 1   |   |
| 6 | 0.2.11.1.1.1.1 | Sebaldella           | 0  | 1   | 0  | 0  | 1   |   |
| 6 | 0.2.11.1.1.1.2 | Streptobacillus      | 0  | 1   | 0  | 0  | 1   |   |
| 2 | 0.2.12         | Gemmatimonadetes     | 1  | 1   | 0  | 0  | 1   |   |
| 3 | 0.2.12.1       | Gemmatimonadetes     | 1  | 1   | 0  | 0  | 1   |   |
| 4 | 0.2.12.1.1     | Gemmatimonadales     | 1  | 1   | 0  | 0  | 1   |   |
| 5 | 0.2.12.1.1.1   | Gemmatimonadaceae    | 1  | 1   | 0  | 0  | 1   |   |
| 6 | 0.2.12.1.1.1.1 | Gemmatimonas         | 0  | 1   | 0  | 0  | 1   |   |
| 2 | 0.2.13         | Lentisphaerae        | 1  | 2   | 0  | 2  | 0   |   |
| 3 | 0.2.13.1       | Lentisphaeria        | 2  | 2   | 0  | 2  | 0   |   |
| 4 | 0.2.13.1.1     | Lentisphaerales      | 1  | 1   | 0  | 1  | 0   |   |
| 5 | 0.2.13.1.1.1   | Lentisphaeraeaceae   | 1  | 1   | 0  | 1  | 0   |   |
| 6 | 0.2.13.1.1.1.1 | Lentisphaera         | 0  | 1   | 0  | 1  | 0   |   |
| 4 | 0.2.13.1.2     | Victivallales        | 1  | 1   | 0  | 1  | 0   |   |
| 5 | 0.2.13.1.2.1   | Victivallaceae       | 1  | 1   | 0  | 1  | 0   |   |
| 6 | 0.2.13.1.2.1.1 | Victivallis          | 0  | 1   | 0  | 0  | 1   |   |
| 2 | 0.2.14         | Nitrospira           | 1  | 1   | 0  | 1  | 1   |   |
| 3 | 0.2.14.1       | Nitrospira           | 1  | 1   | 0  | 1  | 1   |   |
| 4 | 0.2.14.1.1     | Nitrospirales        | 1  | 1   | 0  | 1  | 1   |   |
| 5 | 0.2.14.1.1.1   | Nitrospiraceae       | 1  | 1   | 0  | 1  | 1   |   |
| 6 | 0.2.14.1.1.1.1 | Nitrospira           | 0  | 1   | 0  | 1  | 1   |   |
| 2 | 0.2.15         | Planctomycetes       | 1  | 9   | 8  | 2  | 7   |   |
| 3 | 0.2.15.1       | Planctomycetacia     | 1  | 9   | 8  | 2  | 7   |   |
| 4 | 0.2.15.1.1     | Planctomycetales     | 1  | 9   | 8  | 2  | 7   |   |
| 5 | 0.2.15.1.1.1   | Planctomycetaceae    | 1  | 9   | 8  | 2  | 7   |   |
| 6 | 0.2.15.1.1.1.1 | Blastopirellula      | 0  | 1   | 0  | 0  | 1   |   |
| 6 | 0.2.15.1.1.1.2 | Gemmata              | 0  | 1   | 1  | 0  | 1   |   |
| 6 | 0.2.15.1.1.1.3 | Isosphaera           | 0  | 1   | 0  | 0  | 1   |   |
| 6 | 0.2.15.1.1.1.4 | Pirellula            | 0  | 1   | 1  | 1  | 1   |   |
| 6 | 0.2.15.1.1.1.5 | Planctomyces         | 0  | 1   | 1  | 0  | 1   |   |
| 6 | 0.2.15.1.1.1.6 | Rhodopirellula       | 0  | 1   | 1  | 0  | 1   |   |
| 6 | 0.2.15.1.1.1.7 | Schlesneria          | 0  | 1   | 1  | 1  | 1   |   |
| 6 | 0.2.15.1.1.1.8 | Singulisphaera       | 0  | 1   | 1  | 0  | 1   |   |
| 6 | 0.2.15.1.1.1.9 | Zavarzinella         | 0  | 1   | 1  | 0  | 1   |   |
| 2 | 0.2.16         | Proteobacteria       | 5  | 363 | 60 | 15 | 341 |   |
| 3 | 0.2.16.1       | Alphaproteobacteria  | 11 | 163 | 32 | 6  | 158 |   |
| 4 | 0.2.16.1.1     | Parvularculales      | 1  | 1   | 0  | 0  | 1   |   |
| 5 | 0.2.16.1.1.1   | Parvularculaceae     | 1  | 1   | 0  | 0  | 1   |   |
| 6 | 0.2.16.1.1.1.1 | Parvularcula         | 0  | 1   | 1  | 0  | 1   |   |

|   |                |                                |    |    |    |   |    |   |
|---|----------------|--------------------------------|----|----|----|---|----|---|
| 4 | 0.2.16.1.2     | Alphaproteobacteria_order_inc  | 1  | 4  | 1  | 0 | 4  | 0 |
| 5 | 0.2.16.1.2.1   | Alphaproteobacteria_incertae_s | 4  | 4  | 1  | 0 | 4  | 0 |
| 6 | 0.2.16.1.2.1.1 | Elioraea                       | 0  | 1  | 0  | 0 | 1  | 0 |
| 6 | 0.2.16.1.2.1.2 | Geminococcus                   | 0  | 1  | 1  | 0 | 1  | 0 |
| 6 | 0.2.16.1.2.1.3 | Insolitispirillum              | 0  | 1  | 0  | 0 | 1  | 0 |
| 6 | 0.2.16.1.2.1.4 | Novispirillum                  | 0  | 1  | 0  | 0 | 1  | 0 |
| 4 | 0.2.16.1.3     | Caulobacterales                | 2  | 11 | 4  | 0 | 10 | 0 |
| 5 | 0.2.16.1.3.1   | Caulobacteraceae               | 4  | 4  | 0  | 0 | 4  | 0 |
| 6 | 0.2.16.1.3.1.1 | Asticcacaulis                  | 0  | 1  | 0  | 0 | 1  | 0 |
| 6 | 0.2.16.1.3.1.2 | Brevundimonas                  | 0  | 1  | 0  | 0 | 1  | 0 |
| 6 | 0.2.16.1.3.1.3 | Caulobacter                    | 0  | 1  | 0  | 0 | 1  | 0 |
| 6 | 0.2.16.1.3.1.4 | Phenylobacterium               | 0  | 1  | 0  | 0 | 1  | 0 |
| 5 | 0.2.16.1.3.2   | Hyphomonadaceae                | 7  | 7  | 4  | 0 | 6  | 0 |
| 6 | 0.2.16.1.3.2.1 | Hellea                         | 0  | 1  | 1  | 0 | 1  | 0 |
| 6 | 0.2.16.1.3.2.2 | Hirschia                       | 0  | 1  | 1  | 0 | 1  | 0 |
| 6 | 0.2.16.1.3.2.3 | Hyphomonas                     | 0  | 1  | 0  | 0 | 1  | 0 |
| 6 | 0.2.16.1.3.2.4 | Oceanicaulis                   | 0  | 1  | 1  | 0 | 1  | 0 |
| 6 | 0.2.16.1.3.2.5 | Ponticaulis                    | 0  | 1  | 0  | 0 | 1  | 0 |
| 6 | 0.2.16.1.3.2.6 | Robiginitomaculum              | 0  | 1  | 0  | 0 | 1  | 0 |
| 6 | 0.2.16.1.3.2.7 | Woodsholea                     | 0  | 1  | 1  | 0 | 0  | 0 |
| 4 | 0.2.16.1.4     | Kiloniellales                  | 1  | 1  | 1  | 0 | 1  | 0 |
| 5 | 0.2.16.1.4.1   | Kiloniellaceae                 | 1  | 1  | 1  | 0 | 1  | 0 |
| 6 | 0.2.16.1.4.1.1 | Kiloniella                     | 0  | 1  | 1  | 0 | 1  | 0 |
| 4 | 0.2.16.1.5     | Kordiimonadales                | 1  | 1  | 0  | 0 | 1  | 0 |
| 5 | 0.2.16.1.5.1   | Kordiimonadaceae               | 1  | 1  | 0  | 0 | 1  | 0 |
| 6 | 0.2.16.1.5.1.1 | Kordiimonas                    | 0  | 1  | 0  | 0 | 1  | 0 |
| 4 | 0.2.16.1.6     | Rhizobiales                    | 14 | 66 | 18 | 1 | 65 | 3 |
| 5 | 0.2.16.1.6.1   | Aurantimonadaceae              | 3  | 3  | 1  | 0 | 3  | 0 |
| 6 | 0.2.16.1.6.1.1 | Aurantimonas                   | 0  | 1  | 0  | 0 | 1  | 0 |
| 6 | 0.2.16.1.6.1.2 | Fulvimarina                    | 0  | 1  | 0  | 0 | 1  | 0 |
| 6 | 0.2.16.1.6.1.3 | Martellella                    | 0  | 1  | 1  | 0 | 1  | 1 |
| 5 | 0.2.16.1.6.2   | Bartonellaceae                 | 1  | 1  | 0  | 0 | 1  | 0 |
| 6 | 0.2.16.1.6.2.1 | Bartonella                     | 0  | 1  | 0  | 0 | 1  | 0 |
| 5 | 0.2.16.1.6.3   | Beijerinckiaceae               | 5  | 5  | 4  | 1 | 5  | 0 |
| 6 | 0.2.16.1.6.3.1 | Beijerinckia                   | 0  | 1  | 1  | 0 | 1  | 0 |
| 6 | 0.2.16.1.6.3.2 | Chelatococcus                  | 0  | 1  | 1  | 0 | 1  | 0 |
| 6 | 0.2.16.1.6.3.3 | Methylocapsa                   | 0  | 1  | 1  | 0 | 1  | 0 |
| 6 | 0.2.16.1.6.3.4 | Methylocella                   | 0  | 1  | 1  | 0 | 1  | 0 |
| 6 | 0.2.16.1.6.3.5 | Methylovirgula                 | 0  | 1  | 0  | 1 | 1  | 0 |
| 5 | 0.2.16.1.6.4   | Bradyrhizobiaceae              | 8  | 8  | 2  | 0 | 8  | 0 |
| 6 | 0.2.16.1.6.4.1 | Afipia                         | 0  | 1  | 0  | 0 | 1  | 0 |
| 6 | 0.2.16.1.6.4.2 | Agromonas                      | 0  | 1  | 0  | 0 | 1  | 0 |
| 6 | 0.2.16.1.6.4.3 | Balneimonas                    | 0  | 1  | 0  | 0 | 1  | 0 |
| 6 | 0.2.16.1.6.4.4 | Bosea                          | 0  | 1  | 1  | 0 | 1  | 0 |
| 6 | 0.2.16.1.6.4.5 | Bradyrhizobium                 | 0  | 1  | 0  | 0 | 1  | 0 |
| 6 | 0.2.16.1.6.4.6 | Nitrobacter                    | 0  | 1  | 0  | 0 | 1  | 0 |
| 6 | 0.2.16.1.6.4.7 | Rhodoblastus                   | 0  | 1  | 0  | 0 | 1  | 0 |
| 6 | 0.2.16.1.6.4.8 | Rhodopseudomonas               | 0  | 1  | 1  | 0 | 1  | 0 |
| 5 | 0.2.16.1.6.5   | Brucellaceae                   | 5  | 5  | 0  | 0 | 5  | 1 |
| 6 | 0.2.16.1.6.5.1 | Brucella                       | 0  | 1  | 0  | 0 | 1  | 0 |
| 6 | 0.2.16.1.6.5.2 | Daeguia                        | 0  | 1  | 0  | 0 | 1  | 1 |
| 6 | 0.2.16.1.6.5.3 | Mycoplana                      | 0  | 1  | 0  | 0 | 1  | 0 |
| 6 | 0.2.16.1.6.5.4 | Ochrobactrum                   | 0  | 1  | 0  | 0 | 1  | 0 |
| 6 | 0.2.16.1.6.5.5 | Pseudochrobactrum              | 0  | 1  | 0  | 0 | 1  | 0 |
| 5 | 0.2.16.1.6.6   | Cohaesibacteraceae             | 1  | 1  | 0  | 0 | 1  | 0 |
| 6 | 0.2.16.1.6.6.1 | Cohaesibacter                  | 0  | 1  | 0  | 0 | 1  | 0 |
| 5 | 0.2.16.1.6.7   | Hyphomicrobiaceae              | 12 | 12 | 7  | 0 | 11 | 0 |
| 6 | 0.2.16.1.6.7.1 | Angulomicrobium                | 0  | 1  | 0  | 0 | 1  | 0 |
| 6 | 0.2.16.1.6.7.2 | Blastochloris                  | 0  | 1  | 1  | 0 | 1  | 0 |
| 6 | 0.2.16.1.6.7.3 | Cucumibacter                   | 0  | 1  | 0  | 0 | 1  | 0 |
| 6 | 0.2.16.1.6.7.4 | Devosia                        | 0  | 1  | 1  | 0 | 1  | 0 |
| 6 | 0.2.16.1.6.7.5 | Filomicrobium                  | 0  | 1  | 0  | 0 | 1  | 0 |
| 6 | 0.2.16.1.6.7.6 | Hyphomicrobium                 | 0  | 1  | 1  | 0 | 1  | 0 |
| 6 | 0.2.16.1.6.7.7 | Maritalea                      | 0  | 1  | 0  | 0 | 1  | 0 |
| 6 | 0.2.16.1.6.7.8 | Methylorhabdus                 | 0  | 1  | 1  | 0 | 0  | 0 |
| 6 | 0.2.16.1.6.7.9 | Pedomicrobium                  | 0  | 1  | 1  | 0 | 1  | 0 |
| 6 | 0.2.16.1.6.7.1 | Prosthecomicrobium             | 0  | 1  | 1  | 0 | 1  | 0 |
| 6 | 0.2.16.1.6.7.1 | Rhodoplanes                    | 0  | 1  | 1  | 0 | 1  | 0 |
| 6 | 0.2.16.1.6.7.1 | Zhangella                      | 0  | 1  | 0  | 0 | 1  | 0 |
| 5 | 0.2.16.1.6.8   | Methylobacteriaceae            | 3  | 3  | 0  | 0 | 3  | 0 |
| 6 | 0.2.16.1.6.8.1 | Meganema                       | 0  | 1  | 0  | 0 | 1  | 0 |
| 6 | 0.2.16.1.6.8.2 | Methylobacterium               | 0  | 1  | 0  | 0 | 1  | 0 |
| 6 | 0.2.16.1.6.8.3 | Microvirga                     | 0  | 1  | 0  | 0 | 1  | 0 |
| 5 | 0.2.16.1.6.9   | Methylocystaceae               | 5  | 5  | 1  | 0 | 5  | 1 |
| 6 | 0.2.16.1.6.9.1 | Methylocystis                  | 0  | 1  | 0  | 0 | 1  | 0 |
| 6 | 0.2.16.1.6.9.2 | Methylopila                    | 0  | 1  | 1  | 0 | 1  | 1 |
| 6 | 0.2.16.1.6.9.3 | Methylosinus                   | 0  | 1  | 0  | 0 | 1  | 0 |
| 6 | 0.2.16.1.6.9.4 | Pleomorphomonas                | 0  | 1  | 0  | 0 | 1  | 0 |
| 6 | 0.2.16.1.6.9.5 | Terasakiella                   | 0  | 1  | 0  | 0 | 1  | 0 |
| 5 | 0.2.16.1.6.10  | Phyllobacteriaceae             | 6  | 6  | 2  | 0 | 6  | 0 |
| 6 | 0.2.16.1.6.10  | Aminobacter                    | 0  | 1  | 0  | 0 | 1  | 0 |
| 6 | 0.2.16.1.6.10  | Hoeflea                        | 0  | 1  | 1  | 0 | 1  | 0 |
| 6 | 0.2.16.1.6.10  | Mesorhizobium                  | 0  | 1  | 1  | 0 | 1  | 0 |
| 6 | 0.2.16.1.6.10  | Nitratireductor                | 0  | 1  | 0  | 0 | 1  | 0 |
| 6 | 0.2.16.1.6.10  | Phyllobacterium                | 0  | 1  | 0  | 0 | 1  | 0 |
| 6 | 0.2.16.1.6.10  | Pseudaminobacter               | 0  | 1  | 0  | 0 | 1  | 0 |
| 5 | 0.2.16.1.6.11  | Rhizobiaceae                   | 4  | 4  | 0  | 0 | 4  | 0 |

|   |                |                            |    |    |   |   |    |   |
|---|----------------|----------------------------|----|----|---|---|----|---|
| 6 | 0.2.16.1.6.11  | Ensifer                    | 0  | 1  | 0 | 0 | 1  | 0 |
| 6 | 0.2.16.1.6.11  | Kaistia                    | 0  | 1  | 0 | 0 | 1  | 0 |
| 6 | 0.2.16.1.6.11  | Rhizobium                  | 0  | 1  | 0 | 0 | 1  | 0 |
| 6 | 0.2.16.1.6.11  | Sinorhizobium              | 0  | 1  | 0 | 0 | 1  | 0 |
| 5 | 0.2.16.1.6.12  | Rhizobiales_incertae_sedis | 1  | 1  | 0 | 0 | 1  | 0 |
| 6 | 0.2.16.1.6.12  | Amorphus                   | 0  | 1  | 0 | 0 | 1  | 0 |
| 5 | 0.2.16.1.6.13  | Rhodobiaceae               | 5  | 5  | 0 | 0 | 5  | 0 |
| 6 | 0.2.16.1.6.13  | Afifella                   | 0  | 1  | 0 | 0 | 1  | 0 |
| 6 | 0.2.16.1.6.13  | Andersenella               | 0  | 1  | 0 | 0 | 1  | 0 |
| 6 | 0.2.16.1.6.13  | Parvibaculum               | 0  | 1  | 0 | 0 | 1  | 0 |
| 6 | 0.2.16.1.6.13  | Rhodobium                  | 0  | 1  | 0 | 0 | 1  | 0 |
| 6 | 0.2.16.1.6.13  | Roseospirillum             | 0  | 1  | 0 | 0 | 1  | 0 |
| 5 | 0.2.16.1.6.14  | Xanthobacteraceae          | 7  | 7  | 1 | 0 | 7  | 0 |
| 6 | 0.2.16.1.6.14  | Ancylobacter               | 0  | 1  | 0 | 0 | 1  | 0 |
| 6 | 0.2.16.1.6.14  | Azorhizobium               | 0  | 1  | 0 | 0 | 1  | 0 |
| 6 | 0.2.16.1.6.14  | Labrys                     | 0  | 1  | 0 | 0 | 1  | 0 |
| 6 | 0.2.16.1.6.14  | Pseudolabrys               | 0  | 1  | 0 | 0 | 1  | 0 |
| 6 | 0.2.16.1.6.14  | Pseudoxanthobacter         | 0  | 1  | 0 | 0 | 1  | 0 |
| 6 | 0.2.16.1.6.14  | Starkeya                   | 0  | 1  | 0 | 0 | 1  | 0 |
| 6 | 0.2.16.1.6.14  | Xanthobacter               | 0  | 1  | 1 | 0 | 1  | 0 |
| 4 | 0.2.16.1.7     | Rhodobacterales            | 1  | 25 | 2 | 1 | 23 | 2 |
| 5 | 0.2.16.1.7.1   | Rhodobacteraceae           | 25 | 25 | 2 | 1 | 23 | 2 |
| 6 | 0.2.16.1.7.1.1 | Ahrensia                   | 0  | 1  | 0 | 0 | 1  | 0 |
| 6 | 0.2.16.1.7.1.2 | Albidovulum                | 0  | 1  | 0 | 0 | 1  | 0 |
| 6 | 0.2.16.1.7.1.3 | Albimonas                  | 0  | 1  | 0 | 0 | 1  | 0 |
| 6 | 0.2.16.1.7.1.4 | Amaricoccus                | 0  | 1  | 0 | 0 | 1  | 0 |
| 6 | 0.2.16.1.7.1.5 | Antarctobacter             | 0  | 1  | 0 | 0 | 0  | 1 |
| 6 | 0.2.16.1.7.1.6 | Catellibacterium           | 0  | 1  | 0 | 0 | 1  | 0 |
| 6 | 0.2.16.1.7.1.7 | Haematobacter              | 0  | 1  | 0 | 0 | 1  | 0 |
| 6 | 0.2.16.1.7.1.8 | Jannaschia                 | 0  | 1  | 0 | 0 | 1  | 0 |
| 6 | 0.2.16.1.7.1.9 | Ketogulonicigenium         | 0  | 1  | 0 | 0 | 1  | 0 |
| 6 | 0.2.16.1.7.1.1 | Labrenzia                  | 0  | 1  | 0 | 0 | 1  | 0 |
| 6 | 0.2.16.1.7.1.1 | Loktanelia                 | 0  | 1  | 0 | 0 | 1  | 0 |
| 6 | 0.2.16.1.7.1.1 | Lutimaribacter             | 0  | 1  | 0 | 1 | 1  | 0 |
| 6 | 0.2.16.1.7.1.1 | Maritimibacter             | 0  | 1  | 0 | 0 | 1  | 0 |
| 6 | 0.2.16.1.7.1.1 | Nesiotobacter              | 0  | 1  | 0 | 0 | 1  | 0 |
| 6 | 0.2.16.1.7.1.1 | Palleronia                 | 0  | 1  | 0 | 0 | 1  | 0 |
| 6 | 0.2.16.1.7.1.1 | Pannonibacter              | 0  | 1  | 1 | 0 | 1  | 0 |
| 6 | 0.2.16.1.7.1.1 | Pseudovibrio               | 0  | 1  | 0 | 0 | 1  | 0 |
| 6 | 0.2.16.1.7.1.1 | Rhodobaca                  | 0  | 1  | 0 | 0 | 1  | 0 |
| 6 | 0.2.16.1.7.1.1 | Rhodobacter                | 0  | 1  | 1 | 0 | 1  | 0 |
| 6 | 0.2.16.1.7.1.2 | Rhodothalassium            | 0  | 1  | 0 | 0 | 1  | 0 |
| 6 | 0.2.16.1.7.1.2 | Rhodovulum                 | 0  | 1  | 0 | 0 | 1  | 0 |
| 6 | 0.2.16.1.7.1.2 | Roseinatronobacter         | 0  | 1  | 0 | 0 | 1  | 0 |
| 6 | 0.2.16.1.7.1.2 | Rubellimicrobium           | 0  | 1  | 0 | 0 | 1  | 0 |
| 6 | 0.2.16.1.7.1.2 | Salinihabitans             | 0  | 1  | 0 | 0 | 1  | 0 |
| 6 | 0.2.16.1.7.1.2 | Tropicibacter              | 0  | 1  | 0 | 0 | 0  | 1 |
| 4 | 0.2.16.1.8     | Rhodospirillales           | 2  | 40 | 4 | 4 | 39 | 2 |
| 5 | 0.2.16.1.8.1   | Acetobacteraceae           | 19 | 19 | 0 | 3 | 18 | 2 |
| 6 | 0.2.16.1.8.1.1 | Acidicaldus                | 0  | 1  | 0 | 1 | 1  | 0 |
| 6 | 0.2.16.1.8.1.2 | Acidiphilium               | 0  | 1  | 0 | 0 | 1  | 0 |
| 6 | 0.2.16.1.8.1.3 | Acidisoma                  | 0  | 1  | 0 | 0 | 1  | 0 |
| 6 | 0.2.16.1.8.1.4 | Acidisphaera               | 0  | 1  | 0 | 0 | 1  | 0 |
| 6 | 0.2.16.1.8.1.5 | Acidocella                 | 0  | 1  | 0 | 0 | 1  | 0 |
| 6 | 0.2.16.1.8.1.6 | Acidomonas                 | 0  | 1  | 0 | 0 | 0  | 1 |
| 6 | 0.2.16.1.8.1.7 | Asaia                      | 0  | 1  | 0 | 0 | 1  | 0 |
| 6 | 0.2.16.1.8.1.8 | Belnapia                   | 0  | 1  | 0 | 0 | 1  | 1 |
| 6 | 0.2.16.1.8.1.9 | Craurococcus               | 0  | 1  | 0 | 0 | 1  | 0 |
| 6 | 0.2.16.1.8.1.1 | Grulonacetobacter          | 0  | 1  | 0 | 0 | 1  | 0 |
| 6 | 0.2.16.1.8.1.1 | Granulibacter              | 0  | 1  | 0 | 0 | 1  | 0 |
| 6 | 0.2.16.1.8.1.1 | Kozakia                    | 0  | 1  | 0 | 0 | 1  | 0 |
| 6 | 0.2.16.1.8.1.1 | Neoasaia                   | 0  | 1  | 0 | 0 | 1  | 0 |
| 6 | 0.2.16.1.8.1.1 | Paracraurococcus           | 0  | 1  | 0 | 0 | 1  | 0 |
| 6 | 0.2.16.1.8.1.1 | Rhodopila                  | 0  | 1  | 0 | 1 | 1  | 0 |
| 6 | 0.2.16.1.8.1.1 | Roseomonas                 | 0  | 1  | 0 | 0 | 1  | 0 |
| 6 | 0.2.16.1.8.1.1 | Rubritepida                | 0  | 1  | 0 | 0 | 1  | 0 |
| 6 | 0.2.16.1.8.1.1 | Saccharibacter             | 0  | 1  | 0 | 0 | 1  | 0 |
| 6 | 0.2.16.1.8.1.1 | Stella                     | 0  | 1  | 0 | 1 | 1  | 0 |
| 5 | 0.2.16.1.8.2   | Rhodospirillaceae          | 21 | 21 | 4 | 1 | 21 | 0 |
| 6 | 0.2.16.1.8.2.1 | Azospirillum               | 0  | 1  | 1 | 0 | 1  | 0 |
| 6 | 0.2.16.1.8.2.2 | Caenispirillum             | 0  | 1  | 0 | 0 | 1  | 0 |
| 6 | 0.2.16.1.8.2.3 | Defluviococcus             | 0  | 1  | 0 | 0 | 1  | 0 |
| 6 | 0.2.16.1.8.2.4 | Fodinicurvata              | 0  | 1  | 1 | 0 | 1  | 0 |
| 6 | 0.2.16.1.8.2.5 | Inquilinus                 | 0  | 1  | 1 | 1 | 1  | 0 |
| 6 | 0.2.16.1.8.2.6 | Magnetospirillum           | 0  | 1  | 0 | 0 | 1  | 0 |
| 6 | 0.2.16.1.8.2.7 | Marispirillum              | 0  | 1  | 0 | 0 | 1  | 0 |
| 6 | 0.2.16.1.8.2.8 | Nisaea                     | 0  | 1  | 0 | 0 | 1  | 0 |
| 6 | 0.2.16.1.8.2.9 | Oceanibaculum              | 0  | 1  | 1 | 0 | 1  | 0 |
| 6 | 0.2.16.1.8.2.1 | Pelagibius                 | 0  | 1  | 0 | 0 | 1  | 0 |
| 6 | 0.2.16.1.8.2.1 | Phaeospirillum             | 0  | 1  | 0 | 0 | 1  | 0 |
| 6 | 0.2.16.1.8.2.1 | Rhodocista                 | 0  | 1  | 0 | 0 | 1  | 0 |
| 6 | 0.2.16.1.8.2.1 | Rhodospira                 | 0  | 1  | 0 | 0 | 1  | 0 |
| 6 | 0.2.16.1.8.2.1 | Rhodospirillum             | 0  | 1  | 0 | 0 | 1  | 0 |
| 6 | 0.2.16.1.8.2.1 | Rhodovibrio                | 0  | 1  | 0 | 0 | 1  | 0 |
| 6 | 0.2.16.1.8.2.1 | Roseospira                 | 0  | 1  | 0 | 0 | 1  | 0 |
| 6 | 0.2.16.1.8.2.1 | Skermanella                | 0  | 1  | 0 | 0 | 1  | 0 |
| 6 | 0.2.16.1.8.2.1 | Telmatospirillum           | 0  | 1  | 0 | 0 | 1  | 0 |



|   |                |                                |   |    |    |   |    |    |
|---|----------------|--------------------------------|---|----|----|---|----|----|
| 6 | 0.2.16.1.8.2.1 | Thalassobaculum                | 0 | 1  | 0  | 0 | 1  | 0  |
| 6 | 0.2.16.1.8.2.2 | Thalassospira                  | 0 | 1  | 0  | 0 | 1  | 0  |
| 6 | 0.2.16.1.8.2.2 | Tistrella                      | 0 | 1  | 0  | 0 | 1  | 0  |
| 4 | 0.2.16.1.9     | Rickettsiales                  | 2 | 3  | 0  | 0 | 3  | 0  |
| 5 | 0.2.16.1.9.1   | Anaplasmataceae                | 1 | 1  | 0  | 0 | 1  | 0  |
| 6 | 0.2.16.1.9.1.1 | Ehrlichia                      | 0 | 1  | 0  | 0 | 1  | 0  |
| 5 | 0.2.16.1.9.2   | Rickettsiaceae                 | 2 | 2  | 0  | 0 | 2  | 0  |
| 6 | 0.2.16.1.9.2.1 | Orientia                       | 0 | 1  | 0  | 0 | 1  | 0  |
| 6 | 0.2.16.1.9.2.2 | Rickettsia                     | 0 | 1  | 0  | 0 | 1  | 0  |
| 4 | 0.2.16.1.10    | Sneathiellales                 | 1 | 1  | 0  | 0 | 1  | 0  |
| 5 | 0.2.16.1.10.1  | Sneathiellaceae                | 1 | 1  | 0  | 0 | 1  | 0  |
| 6 | 0.2.16.1.10.1  | Sneathiella                    | 0 | 1  | 0  | 0 | 1  | 0  |
| 4 | 0.2.16.1.11    | Sphingomonadales               | 2 | 10 | 1  | 0 | 10 | 0  |
| 5 | 0.2.16.1.11.1  | Erythrobacteraceae             | 2 | 2  | 0  | 0 | 2  | 0  |
| 6 | 0.2.16.1.11.1  | Croceicoccus                   | 0 | 1  | 0  | 0 | 1  | 0  |
| 6 | 0.2.16.1.11.1  | Erythromicrobium               | 0 | 1  | 0  | 0 | 1  | 0  |
| 5 | 0.2.16.1.11.2  | Sphingomonadaceae              | 8 | 8  | 1  | 0 | 8  | 0  |
| 6 | 0.2.16.1.11.2  | Blastomonas                    | 0 | 1  | 0  | 0 | 1  | 0  |
| 6 | 0.2.16.1.11.2  | Novosphingobium                | 0 | 1  | 0  | 0 | 1  | 0  |
| 6 | 0.2.16.1.11.2  | Sandaracinobacter              | 0 | 1  | 0  | 0 | 1  | 0  |
| 6 | 0.2.16.1.11.2  | Sandarakinorhabdus             | 0 | 1  | 0  | 0 | 1  | 0  |
| 6 | 0.2.16.1.11.2  | Sphingobium                    | 0 | 1  | 0  | 0 | 1  | 0  |
| 6 | 0.2.16.1.11.2  | Sphingomonas                   | 0 | 1  | 1  | 0 | 1  | 0  |
| 6 | 0.2.16.1.11.2  | Sphingopyxis                   | 0 | 1  | 0  | 0 | 1  | 0  |
| 6 | 0.2.16.1.11.2  | Sphingosinicella               | 0 | 1  | 0  | 0 | 1  | 0  |
| 3 | 0.2.16.2       | Betaproteobacteria             | 4 | 31 | 6  | 2 | 25 | 4  |
| 4 | 0.2.16.2.1     | Burkholderiales                | 5 | 17 | 5  | 1 | 13 | 2  |
| 5 | 0.2.16.2.1.1   | Alcaligenaceae                 | 3 | 3  | 1  | 0 | 2  | 0  |
| 6 | 0.2.16.2.1.1.1 | Castellaniella                 | 0 | 1  | 0  | 0 | 1  | 0  |
| 6 | 0.2.16.2.1.1.2 | Derxia                         | 0 | 1  | 1  | 0 | 0  | 0  |
| 6 | 0.2.16.2.1.1.3 | Parasutterella                 | 0 | 1  | 0  | 0 | 1  | 0  |
| 5 | 0.2.16.2.1.2   | Burkholderiaceae               | 3 | 3  | 0  | 0 | 3  | 1  |
| 6 | 0.2.16.2.1.2.1 | Burkholderia                   | 0 | 1  | 0  | 0 | 1  | 0  |
| 6 | 0.2.16.2.1.2.2 | Chitinimonas                   | 0 | 1  | 0  | 0 | 1  | 0  |
| 6 | 0.2.16.2.1.2.3 | Wautersia                      | 0 | 1  | 0  | 0 | 1  | 1  |
| 5 | 0.2.16.2.1.3   | Burkholderiales_incertae_sedis | 4 | 4  | 1  | 1 | 4  | 0  |
| 6 | 0.2.16.2.1.3.1 | Aquabacterium                  | 0 | 1  | 0  | 0 | 1  | 0  |
| 6 | 0.2.16.2.1.3.2 | Ideonella                      | 0 | 1  | 0  | 0 | 1  | 0  |
| 6 | 0.2.16.2.1.3.3 | Rhizobacter                    | 0 | 1  | 0  | 0 | 1  | 0  |
| 6 | 0.2.16.2.1.3.4 | Thiobacter                     | 0 | 1  | 1  | 1 | 1  | 0  |
| 5 | 0.2.16.2.1.4   | Comamonadaceae                 | 5 | 5  | 1  | 0 | 4  | 1  |
| 6 | 0.2.16.2.1.4.1 | Acidovorax                     | 0 | 1  | 0  | 0 | 1  | 0  |
| 6 | 0.2.16.2.1.4.2 | Delftia                        | 0 | 1  | 0  | 0 | 1  | 0  |
| 6 | 0.2.16.2.1.4.3 | Polaromonas                    | 0 | 1  | 0  | 0 | 1  | 0  |
| 6 | 0.2.16.2.1.4.4 | Tepidicella                    | 0 | 1  | 0  | 0 | 0  | 1  |
| 6 | 0.2.16.2.1.4.5 | Variovorax                     | 0 | 1  | 1  | 0 | 1  | 0  |
| 5 | 0.2.16.2.1.5   | Oxalobacteraceae               | 2 | 2  | 2  | 0 | 0  | 0  |
| 6 | 0.2.16.2.1.5.1 | Herbaspirillum                 | 0 | 1  | 1  | 0 | 0  | 0  |
| 6 | 0.2.16.2.1.5.2 | Massilia                       | 0 | 1  | 1  | 0 | 0  | 0  |
| 4 | 0.2.16.2.2     | Hydrogenophilales              | 1 | 2  | 0  | 1 | 2  | 1  |
| 5 | 0.2.16.2.2.1   | Hydrogenophilaceae             | 2 | 2  | 0  | 1 | 2  | 1  |
| 6 | 0.2.16.2.2.1.1 | Hydrogenophilus                | 0 | 1  | 0  | 1 | 1  | 0  |
| 6 | 0.2.16.2.2.1.2 | Tepidiphilus                   | 0 | 1  | 0  | 0 | 1  | 1  |
| 4 | 0.2.16.2.3     | Neisseriales                   | 1 | 7  | 0  | 0 | 7  | 0  |
| 5 | 0.2.16.2.3.1   | Neisseriaceae                  | 7 | 7  | 0  | 0 | 7  | 0  |
| 6 | 0.2.16.2.3.1.1 | Andreprevotia                  | 0 | 1  | 0  | 0 | 1  | 0  |
| 6 | 0.2.16.2.3.1.2 | Aquitalea                      | 0 | 1  | 0  | 0 | 1  | 0  |
| 6 | 0.2.16.2.3.1.3 | Chitinilyticum                 | 0 | 1  | 0  | 0 | 1  | 0  |
| 6 | 0.2.16.2.3.1.4 | Deefgea                        | 0 | 1  | 0  | 0 | 1  | 0  |
| 6 | 0.2.16.2.3.1.5 | Paludibacterium                | 0 | 1  | 0  | 0 | 1  | 0  |
| 6 | 0.2.16.2.3.1.6 | Silvimonas                     | 0 | 1  | 0  | 0 | 1  | 0  |
| 6 | 0.2.16.2.3.1.7 | Vitreoscilla                   | 0 | 1  | 0  | 0 | 1  | 0  |
| 4 | 0.2.16.2.4     | Rhodocyclales                  | 1 | 5  | 1  | 0 | 3  | 1  |
| 5 | 0.2.16.2.4.1   | Rhodocyclaceae                 | 5 | 5  | 1  | 0 | 3  | 0  |
| 6 | 0.2.16.2.4.1.1 | Azonexus                       | 0 | 1  | 0  | 0 | 1  | 0  |
| 6 | 0.2.16.2.4.1.2 | Dechloromonas                  | 0 | 1  | 0  | 0 | 1  | 0  |
| 6 | 0.2.16.2.4.1.3 | Ferribacterium                 | 0 | 1  | 0  | 0 | 1  | 0  |
| 6 | 0.2.16.2.4.1.4 | Methyloversatilis              | 0 | 1  | 1  | 0 | 0  | 0  |
| 6 | 0.2.16.2.4.1.5 | Quatronicoccus                 | 0 | 1  | 0  | 0 | 0  | 1  |
| 3 | 0.2.16.3       | Deltaproteobacteria            | 8 | 49 | 15 | 1 | 45 | 10 |
| 4 | 0.2.16.3.1     | Bdellovibrionales              | 2 | 2  | 0  | 0 | 2  | 0  |
| 5 | 0.2.16.3.1.1   | Bacteriovoracaceae             | 1 | 1  | 0  | 0 | 1  | 0  |
| 6 | 0.2.16.3.1.1.1 | Peredibacter                   | 0 | 1  | 0  | 0 | 1  | 0  |
| 5 | 0.2.16.3.1.2   | Bdellovibrionaceae             | 1 | 1  | 0  | 0 | 1  | 0  |
| 6 | 0.2.16.3.1.2.1 | Bdellovibrio                   | 0 | 1  | 0  | 0 | 1  | 0  |
| 4 | 0.2.16.3.2     | Desulfarculales                | 1 | 1  | 1  | 0 | 1  | 0  |
| 5 | 0.2.16.3.2.1   | Desulfarculaceae               | 1 | 1  | 1  | 0 | 1  | 0  |
| 6 | 0.2.16.3.2.1.1 | Desulfarculus                  | 0 | 1  | 1  | 0 | 1  | 0  |
| 4 | 0.2.16.3.3     | Desulfobacterales              | 2 | 14 | 1  | 0 | 14 | 2  |
| 5 | 0.2.16.3.3.1   | Desulfobacteraceae             | 9 | 9  | 1  | 0 | 9  | 1  |
| 6 | 0.2.16.3.3.1.1 | Desulfatibacillum              | 0 | 1  | 0  | 0 | 1  | 0  |
| 6 | 0.2.16.3.3.1.2 | Desulfatiferula                | 0 | 1  | 0  | 0 | 1  | 0  |
| 6 | 0.2.16.3.3.1.3 | Desulfatirhabdium              | 0 | 1  | 0  | 0 | 1  | 0  |
| 6 | 0.2.16.3.3.1.4 | Desulfobacula                  | 0 | 1  | 0  | 0 | 1  | 0  |
| 6 | 0.2.16.3.3.1.5 | Desulfocella                   | 0 | 1  | 0  | 0 | 1  | 1  |
| 6 | 0.2.16.3.3.1.6 | Desulfococcus                  | 0 | 1  | 0  | 0 | 1  | 0  |
| 6 | 0.2.16.3.3.1.7 | Desulfoluna                    | 0 | 1  | 0  | 0 | 1  | 0  |

|   |                |                       |    |     |   |   |     |   |
|---|----------------|-----------------------|----|-----|---|---|-----|---|
| 6 | 0.2.16.3.3.1.8 | Desulforegula         | 0  | 1   | 1 | 0 | 1   | 0 |
| 6 | 0.2.16.3.3.1.9 | Desulfospira          | 0  | 1   | 0 | 0 | 1   | 0 |
| 5 | 0.2.16.3.3.2   | Desulfobulbaceae      | 5  | 5   | 0 | 0 | 5   | 1 |
| 6 | 0.2.16.3.3.2.1 | Desulfocapsa          | 0  | 1   | 0 | 0 | 1   | 0 |
| 6 | 0.2.16.3.3.2.2 | Desulfopila           | 0  | 1   | 0 | 0 | 1   | 1 |
| 6 | 0.2.16.3.3.2.3 | Desulforhopalus       | 0  | 1   | 0 | 0 | 1   | 0 |
| 6 | 0.2.16.3.3.2.4 | Desulfotalea          | 0  | 1   | 0 | 0 | 1   | 0 |
| 6 | 0.2.16.3.3.2.5 | Desulfurivibrio       | 0  | 1   | 0 | 0 | 1   | 0 |
| 4 | 0.2.16.3.4     | Desulfovibrionales    | 2  | 5   | 2 | 0 | 2   | 2 |
| 5 | 0.2.16.3.4.1   | Desulfobalobiaceae    | 2  | 2   | 1 | 0 | 1   | 0 |
| 6 | 0.2.16.3.4.1.1 | Desulfonatronospira   | 0  | 1   | 0 | 0 | 1   | 0 |
| 6 | 0.2.16.3.4.1.2 | Desulfovermiculus     | 0  | 1   | 1 | 0 | 0   | 0 |
| 5 | 0.2.16.3.4.2   | Desulfovibrionaceae   | 3  | 3   | 1 | 0 | 1   | 2 |
| 6 | 0.2.16.3.4.2.1 | Bilophila             | 0  | 1   | 0 | 0 | 0   | 1 |
| 6 | 0.2.16.3.4.2.2 | Desulfocurvus         | 0  | 1   | 1 | 0 | 1   | 0 |
| 6 | 0.2.16.3.4.2.3 | Lawsonia              | 0  | 1   | 0 | 0 | 0   | 1 |
| 4 | 0.2.16.3.5     | Desulfurellales       | 1  | 1   | 0 | 0 | 1   | 0 |
| 5 | 0.2.16.3.5.1   | Desulfurellaceae      | 1  | 1   | 0 | 0 | 1   | 0 |
| 6 | 0.2.16.3.5.1.1 | Hippea                | 0  | 1   | 0 | 0 | 1   | 0 |
| 4 | 0.2.16.3.6     | Desulfuromonadales    | 2  | 3   | 2 | 0 | 3   | 0 |
| 5 | 0.2.16.3.6.1   | Desulfuromonadaceae   | 1  | 1   | 0 | 0 | 1   | 0 |
| 6 | 0.2.16.3.6.1.1 | Malonomonas           | 0  | 1   | 0 | 0 | 1   | 0 |
| 5 | 0.2.16.3.6.2   | Geobacteraceae        | 2  | 2   | 2 | 0 | 2   | 0 |
| 6 | 0.2.16.3.6.2.1 | Geopsychrobacter      | 0  | 1   | 1 | 0 | 1   | 0 |
| 6 | 0.2.16.3.6.2.2 | Geothermobacter       | 0  | 1   | 1 | 0 | 1   | 0 |
| 4 | 0.2.16.3.7     | Myxococcales          | 7  | 15  | 8 | 1 | 14  | 5 |
| 5 | 0.2.16.3.7.1   | Haliangiaceae         | 1  | 1   | 0 | 0 | 1   | 0 |
| 6 | 0.2.16.3.7.1.1 | Haliangium            | 0  | 1   | 0 | 0 | 1   | 0 |
| 5 | 0.2.16.3.7.2   | Cystobacteraceae      | 4  | 4   | 1 | 0 | 3   | 2 |
| 6 | 0.2.16.3.7.2.1 | Anaeromyxobacter      | 0  | 1   | 1 | 0 | 0   | 1 |
| 6 | 0.2.16.3.7.2.2 | Archangium            | 0  | 1   | 0 | 0 | 0   | 1 |
| 6 | 0.2.16.3.7.2.3 | Hyalangium            | 0  | 1   | 0 | 0 | 1   | 0 |
| 6 | 0.2.16.3.7.2.4 | Melittangium          | 0  | 1   | 0 | 0 | 1   | 0 |
| 5 | 0.2.16.3.7.3   | Kofleriaceae          | 1  | 1   | 1 | 0 | 1   | 0 |
| 6 | 0.2.16.3.7.3.1 | Kofleria              | 0  | 1   | 1 | 0 | 1   | 0 |
| 5 | 0.2.16.3.7.4   | Myxococcaceae         | 2  | 2   | 2 | 0 | 2   | 0 |
| 6 | 0.2.16.3.7.4.1 | Coralloccoccus        | 0  | 1   | 1 | 0 | 1   | 0 |
| 6 | 0.2.16.3.7.4.2 | Pyxidicoccus          | 0  | 1   | 1 | 0 | 1   | 0 |
| 5 | 0.2.16.3.7.5   | Nannocystaceae        | 3  | 3   | 1 | 1 | 3   | 1 |
| 6 | 0.2.16.3.7.5.1 | Enhygromyxa           | 0  | 1   | 0 | 0 | 1   | 0 |
| 6 | 0.2.16.3.7.5.2 | Nannocystis           | 0  | 1   | 1 | 1 | 1   | 0 |
| 6 | 0.2.16.3.7.5.3 | Plesiocystis          | 0  | 1   | 0 | 0 | 1   | 1 |
| 5 | 0.2.16.3.7.6   | Phaselicystidaceae    | 1  | 1   | 1 | 0 | 1   | 0 |
| 6 | 0.2.16.3.7.6.1 | Phaselicystis         | 0  | 1   | 1 | 0 | 1   | 0 |
| 5 | 0.2.16.3.7.7   | Polyangiaceae         | 3  | 3   | 2 | 0 | 3   | 2 |
| 6 | 0.2.16.3.7.7.1 | Byssovorax            | 0  | 1   | 1 | 0 | 1   | 0 |
| 6 | 0.2.16.3.7.7.2 | Chondromyces          | 0  | 1   | 0 | 0 | 1   | 1 |
| 6 | 0.2.16.3.7.7.3 | Sorangium             | 0  | 1   | 1 | 0 | 1   | 1 |
| 4 | 0.2.16.3.8     | Syntrophobacteriales  | 2  | 8   | 1 | 0 | 8   | 1 |
| 5 | 0.2.16.3.8.1   | Syntrophaceae         | 4  | 4   | 0 | 0 | 4   | 0 |
| 6 | 0.2.16.3.8.1.1 | Desulfobacca          | 0  | 1   | 0 | 0 | 1   | 0 |
| 6 | 0.2.16.3.8.1.2 | Desulfomonile         | 0  | 1   | 0 | 0 | 1   | 0 |
| 6 | 0.2.16.3.8.1.3 | Smithella             | 0  | 1   | 0 | 0 | 1   | 0 |
| 6 | 0.2.16.3.8.1.4 | Syntrophus            | 0  | 1   | 0 | 0 | 1   | 0 |
| 5 | 0.2.16.3.8.2   | Syntrophobacteraceae  | 4  | 4   | 1 | 0 | 4   | 1 |
| 6 | 0.2.16.3.8.2.1 | Desulfacinum          | 0  | 1   | 0 | 0 | 1   | 0 |
| 6 | 0.2.16.3.8.2.2 | Desulfoglaeba         | 0  | 1   | 1 | 0 | 1   | 0 |
| 6 | 0.2.16.3.8.2.3 | Desulfovirga          | 0  | 1   | 0 | 0 | 1   | 0 |
| 6 | 0.2.16.3.8.2.4 | Thermodesulforhabdus  | 0  | 1   | 0 | 0 | 1   | 1 |
| 3 | 0.2.16.4       | Epsilonproteobacteria | 2  | 5   | 0 | 0 | 5   | 1 |
| 4 | 0.2.16.4.1     | Campylobacteriales    | 2  | 2   | 0 | 0 | 2   | 0 |
| 5 | 0.2.16.4.1.1   | Hydrogenimonaceae     | 1  | 1   | 0 | 0 | 1   | 0 |
| 6 | 0.2.16.4.1.1.1 | Hydrogenimonas        | 0  | 1   | 0 | 0 | 1   | 0 |
| 5 | 0.2.16.4.1.2   | Helicobacteraceae     | 1  | 1   | 0 | 0 | 1   | 0 |
| 6 | 0.2.16.4.1.2.1 | Sulfuricurvum         | 0  | 1   | 0 | 0 | 1   | 0 |
| 4 | 0.2.16.4.2     | Nautiliales           | 1  | 3   | 0 | 0 | 3   | 1 |
| 5 | 0.2.16.4.2.1   | Nautiliaceae          | 3  | 3   | 0 | 0 | 3   | 1 |
| 6 | 0.2.16.4.2.1.1 | Lebetimonas           | 0  | 1   | 0 | 0 | 1   | 0 |
| 6 | 0.2.16.4.2.1.2 | Nitratifactor         | 0  | 1   | 0 | 0 | 1   | 0 |
| 6 | 0.2.16.4.2.1.3 | Thioreductor          | 0  | 1   | 0 | 0 | 1   | 1 |
| 3 | 0.2.16.5       | Gammaaproteobacteria  | 16 | 115 | 7 | 6 | 108 | 6 |
| 4 | 0.2.16.5.1     | Enterobacteriales     | 1  | 14  | 1 | 4 | 13  | 0 |
| 5 | 0.2.16.5.1.1   | Enterobacteriaceae    | 14 | 14  | 1 | 4 | 13  | 0 |
| 6 | 0.2.16.5.1.1.1 | Buttiauxella          | 0  | 1   | 0 | 0 | 1   | 0 |
| 6 | 0.2.16.5.1.1.2 | Cedecea               | 0  | 1   | 0 | 0 | 1   | 0 |
| 6 | 0.2.16.5.1.1.3 | Citrobacter           | 0  | 1   | 0 | 0 | 1   | 0 |
| 6 | 0.2.16.5.1.1.4 | Enterobacter          | 0  | 1   | 0 | 1 | 1   | 0 |
| 6 | 0.2.16.5.1.1.5 | Escherichia/Shigella  | 0  | 1   | 1 | 0 | 1   | 0 |
| 6 | 0.2.16.5.1.1.6 | Klebsiella            | 0  | 1   | 0 | 1 | 0   | 0 |
| 6 | 0.2.16.5.1.1.7 | Kluyvera              | 0  | 1   | 0 | 1 | 1   | 0 |
| 6 | 0.2.16.5.1.1.8 | Morganella            | 0  | 1   | 0 | 0 | 1   | 0 |
| 6 | 0.2.16.5.1.1.9 | Photorhabdus          | 0  | 1   | 0 | 0 | 1   | 0 |
| 6 | 0.2.16.5.1.1.1 | Plesiomonas           | 0  | 1   | 0 | 0 | 1   | 0 |
| 6 | 0.2.16.5.1.1.1 | Providencia           | 0  | 1   | 0 | 0 | 1   | 0 |
| 6 | 0.2.16.5.1.1.1 | Rahnella              | 0  | 1   | 0 | 0 | 1   | 0 |
| 6 | 0.2.16.5.1.1.1 | Raoultella            | 0  | 1   | 0 | 1 | 1   | 0 |
| 6 | 0.2.16.5.1.1.1 | Serratia              | 0  | 1   | 0 | 0 | 1   | 0 |

|   |                |                               |    |    |   |   |    |   |
|---|----------------|-------------------------------|----|----|---|---|----|---|
| 4 | 0.2.16.5.2     | Salinisphaerales              | 1  | 1  | 0 | 0 | 1  | 0 |
| 5 | 0.2.16.5.2.1   | Salinisphaeraeaceae           | 1  | 1  | 0 | 0 | 1  | 0 |
| 6 | 0.2.16.5.2.1.1 | Salinisphaera                 | 0  | 1  | 0 | 0 | 1  | 0 |
| 4 | 0.2.16.5.3     | Vibrionales                   | 1  | 1  | 0 | 0 | 1  | 0 |
| 5 | 0.2.16.5.3.1   | Vibrionaceae                  | 1  | 1  | 0 | 0 | 1  | 0 |
| 6 | 0.2.16.5.3.1.1 | Aliivibrio                    | 0  | 1  | 0 | 0 | 1  | 0 |
| 4 | 0.2.16.5.4     | Acidithiobacillales           | 1  | 1  | 0 | 0 | 1  | 0 |
| 5 | 0.2.16.5.4.1   | Thermithiobacillaceae         | 1  | 1  | 0 | 0 | 1  | 0 |
| 6 | 0.2.16.5.4.1.1 | Thermithiobacillus            | 0  | 1  | 0 | 0 | 1  | 0 |
| 4 | 0.2.16.5.5     | Aeromonadales                 | 1  | 2  | 0 | 0 | 2  | 0 |
| 5 | 0.2.16.5.5.1   | Succinivibrionaceae           | 2  | 2  | 0 | 0 | 2  | 0 |
| 6 | 0.2.16.5.5.1.1 | Ruminobacter                  | 0  | 1  | 0 | 0 | 1  | 0 |
| 6 | 0.2.16.5.5.1.2 | Succinivibrio                 | 0  | 1  | 0 | 0 | 1  | 0 |
| 4 | 0.2.16.5.6     | Alteromonadales               | 5  | 10 | 0 | 0 | 10 | 0 |
| 5 | 0.2.16.5.6.1   | Alteromonadaceae              | 6  | 6  | 0 | 0 | 6  | 0 |
| 6 | 0.2.16.5.6.1.1 | Aestuariibacter               | 0  | 1  | 0 | 0 | 1  | 0 |
| 6 | 0.2.16.5.6.1.2 | Agarivorans                   | 0  | 1  | 0 | 0 | 1  | 0 |
| 6 | 0.2.16.5.6.1.3 | Bowmanella                    | 0  | 1  | 0 | 0 | 1  | 0 |
| 6 | 0.2.16.5.6.1.4 | Haliea                        | 0  | 1  | 0 | 0 | 1  | 0 |
| 6 | 0.2.16.5.6.1.5 | Marinimicrobium               | 0  | 1  | 0 | 0 | 1  | 0 |
| 6 | 0.2.16.5.6.1.6 | Salinimonas                   | 0  | 1  | 0 | 0 | 1  | 0 |
| 5 | 0.2.16.5.6.2   | Ferrimonadaceae               | 1  | 1  | 0 | 0 | 1  | 0 |
| 6 | 0.2.16.5.6.2.1 | Paraferrimonas                | 0  | 1  | 0 | 0 | 1  | 0 |
| 5 | 0.2.16.5.6.3   | Moritellaceae                 | 1  | 1  | 0 | 0 | 1  | 0 |
| 6 | 0.2.16.5.6.3.1 | Paramoritella                 | 0  | 1  | 0 | 0 | 1  | 0 |
| 5 | 0.2.16.5.6.4   | Pseudoalteromonadaceae        | 1  | 1  | 0 | 0 | 1  | 0 |
| 6 | 0.2.16.5.6.4.1 | Pseudoalteromonas             | 0  | 1  | 0 | 0 | 1  | 0 |
| 5 | 0.2.16.5.6.5   | Shewanellaceae                | 1  | 1  | 0 | 0 | 1  | 0 |
| 6 | 0.2.16.5.6.5.1 | Shewanella                    | 0  | 1  | 0 | 0 | 1  | 0 |
| 4 | 0.2.16.5.7     | Cardiobacteriales             | 1  | 2  | 0 | 0 | 2  | 0 |
| 5 | 0.2.16.5.7.1   | Cardiobacteriaceae            | 2  | 2  | 0 | 0 | 2  | 0 |
| 6 | 0.2.16.5.7.1.1 | Cardiobacterium               | 0  | 1  | 0 | 0 | 1  | 0 |
| 6 | 0.2.16.5.7.1.2 | Suttonella                    | 0  | 1  | 0 | 0 | 1  | 0 |
| 4 | 0.2.16.5.8     | Chromatiales                  | 4  | 19 | 1 | 0 | 17 | 2 |
| 5 | 0.2.16.5.8.1   | Chromatiaceae                 | 11 | 11 | 1 | 0 | 10 | 0 |
| 6 | 0.2.16.5.8.1.1 | Chromatium                    | 0  | 1  | 0 | 0 | 1  | 0 |
| 6 | 0.2.16.5.8.1.2 | Lamprocystis                  | 0  | 1  | 0 | 0 | 1  | 0 |
| 6 | 0.2.16.5.8.1.3 | Marichromatium                | 0  | 1  | 0 | 0 | 1  | 0 |
| 6 | 0.2.16.5.8.1.4 | Nitrosococcus                 | 0  | 1  | 1 | 0 | 0  | 0 |
| 6 | 0.2.16.5.8.1.5 | Rhabdochromatium              | 0  | 1  | 0 | 0 | 1  | 0 |
| 6 | 0.2.16.5.8.1.6 | Thiobaca                      | 0  | 1  | 0 | 0 | 1  | 0 |
| 6 | 0.2.16.5.8.1.7 | Thiococcus                    | 0  | 1  | 0 | 0 | 1  | 0 |
| 6 | 0.2.16.5.8.1.8 | Thiocystis                    | 0  | 1  | 0 | 0 | 1  | 0 |
| 6 | 0.2.16.5.8.1.9 | Thioflavococcus               | 0  | 1  | 0 | 0 | 1  | 0 |
| 6 | 0.2.16.5.8.1.1 | Thiohalocapsa                 | 0  | 1  | 0 | 0 | 1  | 0 |
| 6 | 0.2.16.5.8.1.1 | Thiophageococcus              | 0  | 1  | 0 | 0 | 1  | 0 |
| 5 | 0.2.16.5.8.2   | Ectothiorhodospiraceae        | 5  | 5  | 0 | 0 | 4  | 1 |
| 6 | 0.2.16.5.8.2.1 | Alkalispirillum               | 0  | 1  | 0 | 0 | 0  | 1 |
| 6 | 0.2.16.5.8.2.2 | Arhodomonas                   | 0  | 1  | 0 | 0 | 1  | 0 |
| 6 | 0.2.16.5.8.2.3 | Ectothiorhodosinus            | 0  | 1  | 0 | 0 | 1  | 0 |
| 6 | 0.2.16.5.8.2.4 | Thioalkalispira               | 0  | 1  | 0 | 0 | 1  | 0 |
| 6 | 0.2.16.5.8.2.5 | Thiorhodospira                | 0  | 1  | 0 | 0 | 1  | 0 |
| 5 | 0.2.16.5.8.3   | Granulosicoccaceae            | 1  | 1  | 0 | 0 | 1  | 1 |
| 6 | 0.2.16.5.8.3.1 | Granulosicoccus               | 0  | 1  | 0 | 0 | 1  | 1 |
| 5 | 0.2.16.5.8.4   | Halothiobacillaceae           | 2  | 2  | 0 | 0 | 2  | 0 |
| 6 | 0.2.16.5.8.4.1 | Halothiobacillus              | 0  | 1  | 0 | 0 | 1  | 0 |
| 6 | 0.2.16.5.8.4.2 | Thiofaba                      | 0  | 1  | 0 | 0 | 1  | 0 |
| 4 | 0.2.16.5.9     | Gamma proteobacteria_order_in | 1  | 5  | 0 | 0 | 5  | 0 |
| 5 | 0.2.16.5.9.1   | Gamma proteobacteria_incertae | 5  | 5  | 0 | 0 | 5  | 0 |
| 6 | 0.2.16.5.9.1.1 | Gilvimarinus                  | 0  | 1  | 0 | 0 | 1  | 0 |
| 6 | 0.2.16.5.9.1.2 | Methylhalomonas               | 0  | 1  | 0 | 0 | 1  | 0 |
| 6 | 0.2.16.5.9.1.3 | Thiohalomonas                 | 0  | 1  | 0 | 0 | 1  | 0 |
| 6 | 0.2.16.5.9.1.4 | Thiohalophilus                | 0  | 1  | 0 | 0 | 1  | 0 |
| 6 | 0.2.16.5.9.1.5 | Thiohalorhabdus               | 0  | 1  | 0 | 0 | 1  | 0 |
| 4 | 0.2.16.5.10    | Legionellales                 | 2  | 4  | 0 | 0 | 4  | 0 |
| 5 | 0.2.16.5.10.1  | Coxiellaceae                  | 1  | 1  | 0 | 0 | 1  | 0 |
| 6 | 0.2.16.5.10.1  | Aquicella                     | 0  | 1  | 0 | 0 | 1  | 0 |
| 5 | 0.2.16.5.10.2  | Legionellaceae                | 3  | 3  | 0 | 0 | 3  | 0 |
| 6 | 0.2.16.5.10.2  | Fluoribacter                  | 0  | 1  | 0 | 0 | 1  | 0 |
| 6 | 0.2.16.5.10.2  | Legionella                    | 0  | 1  | 0 | 0 | 1  | 0 |
| 6 | 0.2.16.5.10.2  | Tatlockia                     | 0  | 1  | 0 | 0 | 1  | 0 |
| 4 | 0.2.16.5.11    | Methylococcales               | 1  | 6  | 0 | 0 | 6  | 0 |
| 5 | 0.2.16.5.11.1  | Methylococcaceae              | 6  | 6  | 0 | 0 | 6  | 0 |
| 6 | 0.2.16.5.11.1  | Methylobacter                 | 0  | 1  | 0 | 0 | 1  | 0 |
| 6 | 0.2.16.5.11.1  | Methylococcus                 | 0  | 1  | 0 | 0 | 1  | 0 |
| 6 | 0.2.16.5.11.1  | Methylhalobius                | 0  | 1  | 0 | 0 | 1  | 0 |
| 6 | 0.2.16.5.11.1  | Methylomonas                  | 0  | 1  | 0 | 0 | 1  | 0 |
| 6 | 0.2.16.5.11.1  | Methylsoma                    | 0  | 1  | 0 | 0 | 1  | 0 |
| 6 | 0.2.16.5.11.1  | Methylsphaera                 | 0  | 1  | 0 | 0 | 1  | 0 |
| 4 | 0.2.16.5.12    | Oceanospirillales             | 5  | 19 | 0 | 1 | 18 | 0 |
| 5 | 0.2.16.5.12.1  | Alcanivoracaceae              | 1  | 1  | 0 | 0 | 1  | 0 |
| 6 | 0.2.16.5.12.1  | Kangiella                     | 0  | 1  | 0 | 0 | 1  | 0 |
| 5 | 0.2.16.5.12.2  | Hahellaceae                   | 2  | 2  | 0 | 0 | 2  | 0 |
| 6 | 0.2.16.5.12.2  | Endozoicomonas                | 0  | 1  | 0 | 0 | 1  | 0 |
| 6 | 0.2.16.5.12.2  | Zooshikella                   | 0  | 1  | 0 | 0 | 1  | 0 |
| 5 | 0.2.16.5.12.3  | Halomonadaceae                | 7  | 7  | 0 | 0 | 7  | 0 |
| 6 | 0.2.16.5.12.3  | Aidingimonas                  | 0  | 1  | 0 | 0 | 1  | 0 |

|   |                |                                  |    |    |   |   |    |   |
|---|----------------|----------------------------------|----|----|---|---|----|---|
| 6 | 0.2.16.5.12.3  | Cobetia                          | 0  | 1  | 0 | 0 | 1  | 0 |
| 6 | 0.2.16.5.12.3  | Halomonas                        | 0  | 1  | 0 | 0 | 1  | 0 |
| 6 | 0.2.16.5.12.3  | Halotalea                        | 0  | 1  | 0 | 0 | 1  | 0 |
| 6 | 0.2.16.5.12.3  | Halovibrio                       | 0  | 1  | 0 | 0 | 1  | 0 |
| 6 | 0.2.16.5.12.3  | Modicisalibacter                 | 0  | 1  | 0 | 0 | 1  | 0 |
| 6 | 0.2.16.5.12.3  | Salinicola                       | 0  | 1  | 0 | 0 | 1  | 0 |
| 5 | 0.2.16.5.12.4  | Oceanospirillaceae               | 8  | 8  | 0 | 1 | 7  | 0 |
| 6 | 0.2.16.5.12.4  | Balneatrix                       | 0  | 1  | 0 | 0 | 1  | 0 |
| 6 | 0.2.16.5.12.4  | Bermanella                       | 0  | 1  | 0 | 0 | 1  | 0 |
| 6 | 0.2.16.5.12.4  | Nitrincola                       | 0  | 1  | 0 | 1 | 0  | 0 |
| 6 | 0.2.16.5.12.4  | Oceaniserpentilla                | 0  | 1  | 0 | 0 | 1  | 0 |
| 6 | 0.2.16.5.12.4  | Oceanobacter                     | 0  | 1  | 0 | 0 | 1  | 0 |
| 6 | 0.2.16.5.12.4  | Oleispira                        | 0  | 1  | 0 | 0 | 1  | 0 |
| 6 | 0.2.16.5.12.4  | Pseudospirillum                  | 0  | 1  | 0 | 0 | 1  | 0 |
| 6 | 0.2.16.5.12.4  | Reinekea                         | 0  | 1  | 0 | 0 | 1  | 0 |
| 5 | 0.2.16.5.12.5  | Oceanospirillales_incertae_sedis | 1  | 1  | 0 | 0 | 1  | 0 |
| 6 | 0.2.16.5.12.5  | Spongiispira                     | 0  | 1  | 0 | 0 | 1  | 0 |
| 4 | 0.2.16.5.13    | Pasteurellales                   | 1  | 5  | 0 | 1 | 4  | 0 |
| 5 | 0.2.16.5.13.1  | Pasteurellaceae                  | 5  | 5  | 0 | 1 | 4  | 0 |
| 6 | 0.2.16.5.13.1  | Bibersteinia                     | 0  | 1  | 0 | 1 | 0  | 0 |
| 6 | 0.2.16.5.13.1  | Chelonobacter                    | 0  | 1  | 0 | 0 | 1  | 0 |
| 6 | 0.2.16.5.13.1  | Haemophilus                      | 0  | 1  | 0 | 0 | 1  | 0 |
| 6 | 0.2.16.5.13.1  | Mannheimia                       | 0  | 1  | 0 | 0 | 1  | 0 |
| 6 | 0.2.16.5.13.1  | Phocoenobacter                   | 0  | 1  | 0 | 0 | 1  | 0 |
| 4 | 0.2.16.5.14    | Pseudomonadales                  | 2  | 4  | 1 | 0 | 4  | 0 |
| 5 | 0.2.16.5.14.1  | Moraxellaceae                    | 2  | 2  | 0 | 0 | 2  | 0 |
| 6 | 0.2.16.5.14.1  | Acinetobacter                    | 0  | 1  | 0 | 0 | 1  | 0 |
| 6 | 0.2.16.5.14.1  | Perlucidibaca                    | 0  | 1  | 0 | 0 | 1  | 0 |
| 5 | 0.2.16.5.14.2  | Pseudomonadaceae                 | 2  | 2  | 1 | 0 | 2  | 0 |
| 6 | 0.2.16.5.14.2  | Azorhizophilus                   | 0  | 1  | 0 | 0 | 1  | 0 |
| 6 | 0.2.16.5.14.2  | Pseudomonas                      | 0  | 1  | 1 | 0 | 1  | 0 |
| 4 | 0.2.16.5.15    | Thiotrichales                    | 3  | 7  | 3 | 0 | 6  | 1 |
| 5 | 0.2.16.5.15.1  | Piscirickettsiaceae              | 4  | 4  | 0 | 0 | 4  | 0 |
| 6 | 0.2.16.5.15.1  | Cycloclasticus                   | 0  | 1  | 0 | 0 | 1  | 0 |
| 6 | 0.2.16.5.15.1  | Hydrogenovibrio                  | 0  | 1  | 0 | 0 | 1  | 0 |
| 6 | 0.2.16.5.15.1  | Methylophaga                     | 0  | 1  | 0 | 0 | 1  | 0 |
| 6 | 0.2.16.5.15.1  | Sulfurivirga                     | 0  | 1  | 0 | 0 | 1  | 0 |
| 5 | 0.2.16.5.15.2  | Thiotrichaceae                   | 1  | 1  | 1 | 0 | 1  | 0 |
| 6 | 0.2.16.5.15.2  | Beggiatoa                        | 0  | 1  | 1 | 0 | 1  | 0 |
| 5 | 0.2.16.5.15.3  | Thiotrichales_incertae_sedis     | 2  | 2  | 2 | 0 | 1  | 1 |
| 6 | 0.2.16.5.15.3  | Caedibacter                      | 0  | 1  | 1 | 0 | 0  | 0 |
| 6 | 0.2.16.5.15.3  | Fangia                           | 0  | 1  | 1 | 0 | 1  | 1 |
| 4 | 0.2.16.5.16    | Xanthomonadales                  | 2  | 15 | 1 | 0 | 14 | 3 |
| 5 | 0.2.16.5.16.1  | Sinobacteraceae                  | 5  | 5  | 1 | 0 | 5  | 0 |
| 6 | 0.2.16.5.16.1  | Alkanibacter                     | 0  | 1  | 0 | 0 | 1  | 0 |
| 6 | 0.2.16.5.16.1  | Hydrocarboniphaga                | 0  | 1  | 0 | 0 | 1  | 0 |
| 6 | 0.2.16.5.16.1  | Nevskia                          | 0  | 1  | 0 | 0 | 1  | 0 |
| 6 | 0.2.16.5.16.1  | Singularimonas                   | 0  | 1  | 1 | 0 | 1  | 0 |
| 6 | 0.2.16.5.16.1  | Steroidobacter                   | 0  | 1  | 0 | 0 | 1  | 0 |
| 5 | 0.2.16.5.16.2  | Xanthomonadaceae                 | 10 | 10 | 0 | 0 | 9  | 3 |
| 6 | 0.2.16.5.16.2  | Aquimonas                        | 0  | 1  | 0 | 0 | 1  | 1 |
| 6 | 0.2.16.5.16.2  | Dokdonella                       | 0  | 1  | 0 | 0 | 1  | 0 |
| 6 | 0.2.16.5.16.2  | Dyella                           | 0  | 1  | 0 | 0 | 1  | 0 |
| 6 | 0.2.16.5.16.2  | Frateuria                        | 0  | 1  | 0 | 0 | 0  | 1 |
| 6 | 0.2.16.5.16.2  | Fulvimonas                       | 0  | 1  | 0 | 0 | 1  | 1 |
| 6 | 0.2.16.5.16.2  | Luteimonas                       | 0  | 1  | 0 | 0 | 1  | 0 |
| 6 | 0.2.16.5.16.2  | Pseudoxanthomonas                | 0  | 1  | 0 | 0 | 1  | 0 |
| 6 | 0.2.16.5.16.2  | Rhodanobacter                    | 0  | 1  | 0 | 0 | 1  | 0 |
| 6 | 0.2.16.5.16.2  | Rudaea                           | 0  | 1  | 0 | 0 | 1  | 0 |
| 6 | 0.2.16.5.16.2  | Stenotrophomonas                 | 0  | 1  | 0 | 0 | 1  | 0 |
| 2 | 0.2.17         | Spirochaetes                     | 1  | 2  | 0 | 0 | 2  | 0 |
| 3 | 0.2.17.1       | Spirochaetes                     | 1  | 2  | 0 | 0 | 2  | 0 |
| 4 | 0.2.17.1.1     | Spirochaetales                   | 1  | 2  | 0 | 0 | 2  | 0 |
| 5 | 0.2.17.1.1.1   | Leptospiraceae                   | 2  | 2  | 0 | 0 | 2  | 0 |
| 6 | 0.2.17.1.1.1.1 | Leptonema                        | 0  | 1  | 0 | 0 | 1  | 0 |
| 6 | 0.2.17.1.1.1.2 | Turneriella                      | 0  | 1  | 0 | 0 | 1  | 0 |
| 2 | 0.2.18         | Synergistetes                    | 1  | 1  | 0 | 1 | 4  | 4 |
| 3 | 0.2.18.1       | Synergistia                      | 1  | 6  | 0 | 1 | 4  | 4 |
| 4 | 0.2.18.1.1     | Synergistales                    | 1  | 6  | 0 | 1 | 4  | 4 |
| 5 | 0.2.18.1.1.1   | Synergistaceae                   | 6  | 6  | 0 | 1 | 4  | 4 |
| 6 | 0.2.18.1.1.1.1 | Aminiphilus                      | 0  | 1  | 0 | 1 | 0  | 1 |
| 6 | 0.2.18.1.1.1.2 | Aminomonas                       | 0  | 1  | 0 | 0 | 1  | 1 |
| 6 | 0.2.18.1.1.1.3 | Jonquetella                      | 0  | 1  | 0 | 0 | 1  | 0 |
| 6 | 0.2.18.1.1.1.4 | Pyramidobacter                   | 0  | 1  | 0 | 0 | 1  | 1 |
| 6 | 0.2.18.1.1.1.5 | Synergistes                      | 0  | 1  | 0 | 0 | 0  | 1 |
| 6 | 0.2.18.1.1.1.6 | Thermovirga                      | 0  | 1  | 0 | 0 | 1  | 0 |
| 2 | 0.2.19         | Tenericutes                      | 1  | 1  | 0 | 1 | 1  | 1 |
| 3 | 0.2.19.1       | Mollicutes                       | 1  | 1  | 0 | 1 | 1  | 1 |
| 4 | 0.2.19.1.1     | Anaeroplasmatales                | 1  | 1  | 0 | 1 | 1  | 1 |
| 5 | 0.2.19.1.1.1   | Anaeroplasmataceae               | 1  | 1  | 0 | 1 | 1  | 1 |
| 6 | 0.2.19.1.1.1.1 | Asteroleplasma                   | 0  | 1  | 0 | 1 | 1  | 1 |
| 2 | 0.2.20         | Thermodesulfobacteria            | 1  | 2  | 0 | 2 | 2  | 0 |
| 3 | 0.2.20.1       | Thermodesulfobacteria            | 1  | 2  | 0 | 2 | 2  | 0 |
| 4 | 0.2.20.1.1     | Thermodesulfobacteriales         | 1  | 2  | 0 | 2 | 2  | 0 |
| 5 | 0.2.20.1.1.1   | Thermodesulfobacteriaceae        | 2  | 2  | 0 | 2 | 2  | 0 |
| 6 | 0.2.20.1.1.1.1 | Caldimicrobium                   | 0  | 1  | 0 | 1 | 1  | 0 |
| 6 | 0.2.20.1.1.1.2 | Thermodesulfatator               | 0  | 1  | 0 | 1 | 1  | 0 |

|   |                |                               |   |    |   |   |   |   |
|---|----------------|-------------------------------|---|----|---|---|---|---|
| 2 | 0.2.21         | Thermotogae                   | 1 | 2  | 0 | 0 | 0 | 2 |
| 3 | 0.2.21.1       | Thermotogae                   | 1 | 2  | 0 | 0 | 0 | 2 |
| 4 | 0.2.21.1.1     | Thermotogales                 | 1 | 2  | 0 | 0 | 0 | 2 |
| 5 | 0.2.21.1.1.1   | Thermotogaceae                | 2 | 2  | 0 | 0 | 0 | 2 |
| 6 | 0.2.21.1.1.1.1 | Geotoga                       | 0 | 1  | 0 | 0 | 0 | 1 |
| 6 | 0.2.21.1.1.1.2 | Kosmotoga                     | 0 | 1  | 0 | 0 | 0 | 1 |
| 2 | 0.2.22         | Verrucomicrobia               | 4 | 10 | 5 | 1 | 4 | 2 |
| 3 | 0.2.22.1       | Opitutae                      | 2 | 3  | 0 | 0 | 2 | 2 |
| 4 | 0.2.22.1.1     | Opitutales                    | 1 | 2  | 0 | 0 | 2 | 1 |
| 5 | 0.2.22.1.1.1   | Opitutaceae                   | 2 | 2  | 0 | 0 | 2 | 1 |
| 6 | 0.2.22.1.1.1.1 | Alterococcus                  | 0 | 1  | 0 | 0 | 1 | 0 |
| 6 | 0.2.22.1.1.1.2 | Opitutus                      | 0 | 1  | 0 | 0 | 1 | 1 |
| 4 | 0.2.22.1.2     | Puniceococcales               | 1 | 1  | 0 | 0 | 0 | 1 |
| 5 | 0.2.22.1.2.1   | Puniceococcaceae              | 1 | 1  | 0 | 0 | 0 | 1 |
| 6 | 0.2.22.1.2.1.1 | Cerasicoccus                  | 0 | 1  | 0 | 0 | 0 | 1 |
| 3 | 0.2.22.2       | Spartobacteria                | 1 | 1  | 1 | 0 | 0 | 0 |
| 4 | 0.2.22.2.1     | unclassified                  | 1 | 1  | 1 | 0 | 0 | 0 |
| 5 | 0.2.22.2.1.1   | unclassified                  | 1 | 1  | 1 | 0 | 0 | 0 |
| 6 | 0.2.22.2.1.1.1 | unclassified                  | 0 | 1  | 1 | 0 | 0 | 0 |
| 3 | 0.2.22.3       | Subdivision3                  | 1 | 1  | 1 | 0 | 0 | 0 |
| 4 | 0.2.22.3.1     | unclassified                  | 1 | 1  | 1 | 0 | 0 | 0 |
| 5 | 0.2.22.3.1.1   | unclassified                  | 1 | 1  | 1 | 0 | 0 | 0 |
| 6 | 0.2.22.3.1.1.1 | unclassified                  | 0 | 1  | 1 | 0 | 0 | 0 |
| 3 | 0.2.22.4       | Verrucomicrobiae              | 1 | 5  | 3 | 1 | 2 | 0 |
| 4 | 0.2.22.4.1     | Verrucomicrobiales            | 1 | 5  | 3 | 1 | 2 | 0 |
| 5 | 0.2.22.4.1.1   | Verrucomicrobiaceae           | 5 | 5  | 3 | 1 | 2 | 0 |
| 6 | 0.2.22.4.1.1.1 | Akkermansia                   | 0 | 1  | 0 | 0 | 1 | 0 |
| 6 | 0.2.22.4.1.1.2 | Luteolibacter                 | 0 | 1  | 0 | 1 | 0 | 0 |
| 6 | 0.2.22.4.1.1.3 | Persicirhabdus                | 0 | 1  | 1 | 0 | 1 | 0 |
| 6 | 0.2.22.4.1.1.4 | Prostheco bacter              | 0 | 1  | 1 | 0 | 0 | 0 |
| 6 | 0.2.22.4.1.1.5 | Verrucomicrobium              | 0 | 1  | 1 | 0 | 0 | 0 |
| 2 | 0.2.23         | Bacteria_incertae_sedis       | 1 | 1  | 0 | 0 | 1 | 0 |
| 3 | 0.2.23.1       | Ktedonobacteria               | 1 | 1  | 0 | 0 | 1 | 0 |
| 4 | 0.2.23.1.1     | Ktedonobacteriales            | 1 | 1  | 0 | 0 | 1 | 0 |
| 5 | 0.2.23.1.1.1   | Ktedonobacteraceae            | 1 | 1  | 0 | 0 | 1 | 0 |
| 6 | 0.2.23.1.1.1.1 | Ktedonobacter                 | 0 | 1  | 0 | 0 | 1 | 0 |
| 2 | 0.2.24         | Cyanobacteria                 | 1 | 1  | 0 | 0 | 0 | 1 |
| 3 | 0.2.24.1       | Cyanobacteria                 | 1 | 1  | 0 | 0 | 0 | 1 |
| 4 | 0.2.24.1.1     | Cyanobacteria_order_incertae_ | 1 | 1  | 0 | 0 | 0 | 1 |
| 5 | 0.2.24.1.1.1   | Chloroplast                   | 1 | 1  | 0 | 0 | 0 | 1 |
| 6 | 0.2.24.1.1.1.1 | Chlorarachniophyceae          | 0 | 1  | 0 | 0 | 0 | 1 |
| 2 | 0.2.25         | OP10                          | 1 | 1  | 1 | 0 | 1 | 0 |
| 3 | 0.2.25.1       | unclassified                  | 1 | 1  | 1 | 0 | 1 | 0 |
| 4 | 0.2.25.1.1     | unclassified                  | 1 | 1  | 1 | 0 | 1 | 0 |
| 5 | 0.2.25.1.1.1   | unclassified                  | 1 | 1  | 1 | 0 | 1 | 0 |
| 6 | 0.2.25.1.1.1.1 | unclassified                  | 0 | 1  | 1 | 0 | 1 | 0 |
